25 **Abstract**

26 Allometry predicts that the 12–17 g American water shrew (*Sorex palustris*)—the world’s smallest  
27 mammalian diver—will have the highest diving metabolic rate (DMR) coupled with the lowest  
28 total body oxygen storage capacity, skeletal muscle buffering capacity, and glycolytic potential of  
29 any endothermic diver. Despite these constraints, the maximum dive time (23.7 sec) and calculated  
30 aerobic dive limit (cADL; 10.8–14.4 sec) of wild-caught water shrews match or exceed values  
31 predicted by allometry based on studies of larger-bodied divers. The mean voluntary dive time of  
32 water shrews in 3, 10, 20, and 30°C water was  $5.1 \pm 0.1$  sec ( $N=25$ ,  $n=1584$ ), with a mean maximum  
33 dive time of  $10.3 \pm 0.4$  sec. Only 2.3–3.9% of dives in 30 and 10°C water, respectively, exceeded  
34 the cADL. Mean dive duration, duration of the longest dive, and total time in water all decreased  
35 significantly as temperature declined, suggesting that shrews employed behavioural  
36 thermoregulation to defend against immersion hypothermia. As expected from their low thermal  
37 inertia, diving shrews had a significantly higher DMR in 10°C ( $8.77 \text{ mL O}_2 \text{ g}^{-1} \text{ hr}^{-1}$ ) compared to  
38 30°C water ( $6.57 \text{ mL O}_2 \text{ g}^{-1} \text{ hr}^{-1}$ ). Diving behavior of radio-telemetered shrews exclusively  
39 foraging in a simulated riparian environment (3°C water) for 12- to 28-hours suggest that mean  
40 (but not maximum) dive times of water shrews in the wild may be longer than predicted from our  
41 voluntary dive trials, as the average dive duration ( $6.9 \pm 0.2$  sec,  $n=257$ ) was  $\sim 1.75\times$  longer than  
42 during 20-min trials with no access to food at the same water temperature. Notably, free-diving  
43 shrews in the 24-hr trials consistently elevated core body temperature by  $\sim 1.0\text{--}1.5^\circ\text{C}$  immediately  
44 prior to initiating aquatic foraging bouts, and ended these bouts when body temperature was still  
45 at or above normal resting levels ( $\sim 37.8^\circ\text{C}$ ). We suggest this observed pre-dive hyperthermia aids  
46 to heighten the impressive somatosensory physiology, and hence foraging efficiency, of this  
47 diminutive predator while submerged.

48

## 49 **Introduction**

50 The three primary factors dictating the maximum underwater endurance of air-breathing  
51 mammalian divers—anaerobic capacity, total onboard oxygen stores, and the rate at which these  
52 reserves are consumed—are all strongly influenced by body size (Emmett and Hochachka, 1981;  
53 Schreer and Kovaks, 1997; Halsey et al. 2006). The mass-specific rate of O<sub>2</sub> consumption ( $\dot{V}O_2$ ),  
54 for instance, varies inversely with body mass according to a scaling coefficient of  $-0.25$  to  $-0.33$   
55 (Kleiber 1975; White and Seymour 2003). Conversely, the catalytic activity of glycolytic enzymes  
56 (i.e., glycogen phosphorylase, pyruvate kinase, and lactate dehydrogenase), and hence the  
57 maximum anaerobic potential of muscle, scales positively with size among mammals with an  
58 exponent of 1.09 to 1.15 (Emmett and Hochachka, 1981). Finally, body oxygen stores representing  
59 the combined oxygen reserves of lungs, blood, and muscle scale approximately isometrically with  
60 body mass (Calder 1996). Taken together, the resultant elevation in mass-specific  $\dot{V}O_2$  of small  
61 amphibious species actively swimming underwater (diving metabolic rate, DMR), coupled with  
62 lower absolute oxygen stores, should lead to a disproportionate reduction in their aerobic dive  
63 performance relative to larger divers. Maximal submergence times should be further curtailed by  
64 a reduced ability to exploit anaerobic pathways for ATP production and buffer aerobic (CO<sub>2</sub>) and  
65 anaerobic byproducts (lactic acid). As with dive endurance, the body surface area-to-volume ratio  
66 varies inversely with body size, resulting in lower mass-specific thermoregulatory costs for larger  
67 divers compared to their smaller counterparts (MacArthur 1989). Small-bodied divers also have a  
68 limited capacity for enhancing pelage or tissue insulation, while large divers are often endowed  
69 with a thick blubber layer or fur that dramatically increases whole-body insulation (Favilla and  
70 Costa 2020). All of these factors predispose small, semi-aquatic species to higher mass-specific  
71 rates of heat loss in the aquatic medium than is the case for their larger counterparts.

72 Given the significant physiological challenges facing small-bodied amphibious divers, it is  
73 surprising that relatively few studies have examined the diving capacity and aquatic thermal  
74 biology of mammals weighing less than 5 kg (e.g., Dawson and Fanning 1981; MacArthur  
75 1984a; Evans et al. 1994; Hindle et al. 2006; Harrington et al. 2012; Jordaan et al. 2021).  
76 Moreover, to our knowledge, comparable data for the smallest mammalian divers (<100 g) are  
77 available only for star-nosed moles, *Condylura cristata* (McIntyre et al. 2002), European water  
78 shrews, *Neomys fodiens* (Köhler 1991; Vogel 1998), and, to a more limited extent, American  
79 water shrews, *Sorex palustris* (Calder 1969; McIntyre 2000).

80 Weighing in at 12 to 17 g, American water shrews are the world's smallest endothermic  
81 divers. Well adapted to the cold, *S. palustris* primarily exploit riparian habitats within the boreal  
82 forests of North America, and can be found from Labrador in the east to above 60°N in the  
83 Northwest Territories, Yukon, and Alaska in the west (Whittaker et al. 2008). Semi-aquatic in  
84 nature, they forage both in and along the edges of ponds and fast-flowing streams and rivers,  
85 with up to 50–80% of their food intake coming from minnows, tadpoles, insect larvae, nymphs,  
86 crayfish, and other aquatic invertebrates (Conaway 1952; Sorenson 1962; but see Hamilton  
87 1930). Somewhat surprisingly, vision plays a very limited role for underwater food detection  
88 as prey capture success has been shown to be unaffected in total darkness (Catania et al. 2008).  
89 Instead, this flush-pursuit predator relies heavily on its remarkably acute nasal vibrissae to  
90 locate prey (even remotely through water movements), which they then attack with astonishing  
91 speed (<50 msec). The added ability to identify sedentary prey underwater via nasal olfaction  
92 further cements American water shrews as one of the most agile and efficient of underwater  
93 hunters on the planet (Catania et al. 2008; Catania 2013).

94 Consistent with their aggressive predatory lifestyle, *S. palustris* are able to consume >10%  
95 of their body mass in a single sitting and, accordingly, have the highest mass-specific BMR of  
96 any eutherian diver examined to date (~3 times the mass-predicted value for a similar-sized  
97 mammal; Gusztak et al. 2005). Their strong positive buoyancy additionally requires constant  
98 paddling to remain submerged, and further suggests that the water shrew may also have an  
99 extremely high DMR and thus be limited to very short dives if it routinely stays within its  
100 calculated aerobic dive limit (cADL). Due to its small thermal inertia and large relative surface  
101 area, the water shrew should also lose heat rapidly while swimming and diving. As with other  
102 soricine (red-toothed) shrews, *S. palustris* are active year-round, though presumably are faced  
103 with greater energetic costs than terrestrial shrews given their aquatic lifestyle. This is  
104 especially true during winter while foraging under the ice, when convective heat loss is likely  
105 to pose a formidable challenge. Consequently, this diminutive insectivore is of interest not only  
106 in terms of its dive endurance, but also with respect to its thermoregulatory competence since,  
107 in theory, it should be highly susceptible to immersion hypothermia after even brief periods of  
108 aquatic activity.

109 The primary aim of this study was to investigate the dive performance and aquatic  
110 thermoregulatory ability of wild-caught *S. palustris* in both laboratory and semi-natural  
111 settings. Briefly, 20-min aquatic trials were completed to assess the diving behavior of this  
112 species, as well as test for the occurrence of behavioral thermoregulation in water shrews  
113 voluntarily diving over a range of water temperatures. To provide insight into the extent to  
114 which water shrews depend on aerobic metabolism while submerged, a second major objective  
115 was to determine this species' cADL, which required measuring DMR and determining its total  
116 body oxygen storage capacity. Finally, to test whether this species takes advantage of

117 immersion hypothermia to extend its dive duration while foraging in cold water, radio-  
118 telemetered water shrews were provided access to a semi-natural riparian environment (water  
119 temperature=3°C) where they were required to forage exclusively under water during 12- to 28-  
120 hr trials.

121

## 122 **Material and Methods**

### 123 *Animal Capture and Care*

124 Sixty-seven water shrews were live trapped in Whiteshell (49°47'N, 95°13'W) and Nopiming  
125 (50°28'N, 95°15'W) Provincial Parks, Manitoba, Canada, using Sherman live traps (256 cm × 76  
126 cm × 76 cm). For comparative analysis, 18 short-tailed shrews, *Blarina brevicauda*, were also  
127 captured. Trapping techniques and holding conditions in captivity are detailed elsewhere (Gusztak  
128 and Campbell 2004; Hindle et al. 2009). Briefly, traps baited with frozen minnows were set out  
129 overnight and inspected every 2 hr to minimize trap mortality. Water shrew traps were placed on  
130 the edges of streams and ponds with abundant sedge, while short-tailed shrews were trapped in  
131 grass thickets located a few meters inland from the water shrew sets. Immediately upon capture,  
132 shrews were placed individually into covered 38-l plastic containers fitted with screen lids and  
133 supplied with soil, dried grass and leaves, a layer of thick moss, rocks, logs, a nest box (100 mm  
134 × 100 mm × 125 mm), and water trays. Provisions included meal worms, *Tenebrio molitor*, hulled  
135 sunflower seeds, ground Purina cat food™, and a prepared meat mixture (see below), along with  
136 any invertebrates found while trapping. Shrews were transported to the University of Manitoba  
137 Animal Holding Facility on the morning following capture.

138 Vogel (1990) suggested that captive European water shrews lose the hydrophobic properties  
139 of their pelage when animals are not provided with holding conditions that permit diving and

140 access to dry moss for burrowing following aquatic activity. Consequently, much care was  
141 taken in the design and continued maintenance of the holding tanks to ensure the fur of water  
142 shrews was always in optimal condition. Modified 264-l glass aquaria (88 cm × 50 cm × 60  
143 cm) with screened lids served as individual long-term holding containers for water shrews (see  
144 Gusztak and Campbell 2004). Each holding tank had a discrete terrestrial (~75%) and aquatic  
145 (~25%) compartment separated by a 1-cm thick Plexiglas partition. Short-tailed shrews were  
146 individually housed in 76-l terrestrial containers and were supplied with water dishes that were  
147 refilled every 12 hr. For both species, the terrestrial area was furnished as described above for  
148 the transport containers. Both species were offered a prepared meat mixture (beef and chicken  
149 hearts, pig and beef liver, ground beef, fish fillets, and canned dog food mixed with vitamin and  
150 calcium supplements) every 12 hr. To ensure water shrews were habitually swimming and  
151 diving in the setup, they were required to swim across the tank and dive under a removable  
152 partition to access the feeding tray. Additionally, mealworm larvae and aquatic prey (leeches,  
153 dragonfly nymphs, and small crayfish) were occasionally placed in the aquatic portion of the  
154 water shrew tanks to encourage natural foraging behavior. When offered, aquatic prey was  
155 preferentially consumed over the meat ration.

156 To minimize stress, shrews were never handled by hand. Transfer to and from the holding  
157 tanks was accomplished by placing a short (~15 cm) blind-ending section of ABS tube (3.5 cm  
158 internal diameter) in the chamber, which the shrews readily entered. The tube was quickly  
159 capped and then opened following transfer, allowing the animal to exit freely. All wild shrews  
160 used in diving trials or for tissue processing were acclimated to holding conditions for a  
161 minimum period of three weeks before diving trials were initiated. Water shrews were allowed  
162 a recovery period of at least 48 hr between successive experimental trials (see below). As the

163 integrity of the air boundary in the fur was found to strongly influence DMR,  $T_b$ , and activity  
164 level, diving/metabolic trials in which the shrews fur became wetted were not included in any  
165 subsequent analyses.

166 Shrews are short-lived, with maximum life spans for both species in the wild being about 18  
167 months (George et al. 1986; Beneski and Stinson 1987). Individual shrews were aged post-  
168 mortem based on the presence or absence of tooth growth rings following Hindle et al. (2009),  
169 and subsequently divided into juveniles (~1–3 months of age) or adults (~13–15 months). All  
170 study animals were captured under permission of Government of Manitoba Conservation  
171 trapping permits, and cared for in accordance with the principles and guidelines of the Canadian  
172 Council of Animal Care (University of Manitoba Animal Use Protocols: F01-025 and F05-  
173 014).

174

#### 175 *Body Temperature Recordings*

176 Twelve water shrews were each equipped with a ~1.0-g model X-M transmitter (Mini-Mitter Inc.,  
177 Sunriver, OR, USA) surgically implanted in the abdominal cavity. Five of these shrews underwent  
178 a second surgery 4 to 6 weeks later to implant replacement transmitters. Each transmitter was  
179 modified from the original packaging to decrease its overall size/mass and then calibrated  
180 following the method of Dyck and MacArthur (1992). Transmitter modification and surgical  
181 procedures are described in detail by Gusztak et al. (2005). Briefly, shrews were anesthetized with  
182 Isoflurane, first given at 3% for induction and then manually adjusted, as needed, between 2 and  
183 3% to maintain a surgical plane of anesthesia. A midline incision through the skin and body wall  
184 was made along the *linea alba*. The sterilized transmitter was then placed into the abdominal cavity  
185 and incisions closed with sutures; no mortalities were recorded following this surgical procedure.



186 Post-operative surgical care included placement of the shrews in a disinfected 38-l plastic container  
187 containing a nest box and shredded paper towel. Shrews were supplied with fresh food and water  
188 every 12 hr and were transferred back to their holding tanks after 48 hr. Aquatic trials started 7 to  
189 10 days later.

190

### 191 *Voluntary Dive Behavior*

192 We recorded the frequency and duration of voluntary dives by 25 water shrews (six of which were  
193 implanted with temperature-sensitive radio transmitters) over 20-min trials conducted in a 170.5  
194 cm × 68 cm fiberglass dive tank filled with water to a depth of 60 cm (McIntyre et al. 2002). A  
195 transparent dive platform (17.5 cm × 68 cm) was situated at one end just above the waterline. A  
196 4-cm section of ABS tube (internal diameter=3.5 cm) was fastened to the platform to provide a  
197 darkened refuge for the shrew. The center section of the tank contained open water (75 cm × 68  
198 cm), while the remainder of the tank was covered with a sheet of 1-cm thick Plexiglas (78 cm ×  
199 68 cm) to encourage exploratory diving behavior. The Plexiglas sheet was equipped with handles  
200 so it could be removed quickly if a shrew became disorientated beneath.

201 Prey was absent from the dive tank, though shrews were offered a single mealworm 10 min  
202 before each trial. The mass of each animal was recorded just prior to feeding. To familiarize  
203 shrews with the dive arena, each animal completed a pre-trial training run in 30°C water.  
204 Behavioral dive trials were then conducted in randomized order in 3, 10, 20, or 30°C water.  
205 Trials were initiated when the shrew first entered the water and lasted precisely 20 min. Data  
206 were collected during the trial using a Sony Microcassette Recorder for post-trial analyses of  
207 dive durations and frequencies, inter-dive times, time in water, and grooming behavior.

208 For the implanted shrews, rates of body cooling and re-warming were also assessed via body  
209 temperature ( $T_b$ ) data recorded during the 5-min pre-trial, 20-min dive trial, and 10-min post-  
210 trial periods, respectively. Radio signals from the Mini-mitters were continuously recorded via  
211 a Sony Cassette-Recorder that was placed outside the terrestrial section of the tank and  $T_b$  data  
212 subsequently analyzed at 1-min intervals.

213 In addition to the above 20-min dive trials,  $T_b$ , relative activity, swim/dive times, and  
214 foraging behavior of five of the radio-telemetered adult water shrews were continuously video  
215 recorded for a 12- to 28-hr period in a simulated riparian environment maintained at 3°C. Each  
216 shrew was only tested once in this setup. For these trials, the previously described fiberglass  
217 tank was shortened to 120 cm and furnished with river-washed rocks and an artificial riverbank  
218 set attached to one side (supplemental Fig. 1). The set had a ~10 cm wide bank that allowed the  
219 shrew to run along the length of the aquatic enclosure. A 60-cm long clear PVC tube linked the  
220 water tank to a clear plastic terrestrial chamber so that the shrew was always visible when active.  
221 The terrestrial chamber was housed with a nest box, moss, and rocks, and was placed on a  
222 motion activity detector (MAD-1; Sable Systems Inc.). *Ad libitum* invertebrate prey items  
223 (leeches, crayfish, mealworms) were placed in the water thereby requiring shrews to forage  
224 exclusively under water (~55 cm depth) for the duration of the trials. Water shrews were  
225 provided an 8-hr pretrial period to acclimate to the setup.

226

### 227 *Metabolic Cost of Diving*

228 The costs of bouts of diving, grooming, and re-warming of 12 radio-implanted water shrews  
229 voluntarily diving in a 208 cm × 55 cm fiberglass tank filled with water to a depth of 44 cm were  
230 measured with open-flow respirometry following McIntyre et al. (2002). The tank was covered

231 with three removable Plexiglas panels placed just below the waterline. A curved section of clear  
232 tubing 4 cm in diameter and 5 cm long connected the water tank to a 170-mL metabolic chamber  
233 constructed from a 6-cm length of Plexiglas tubing (internal diameter=6 cm). A removable rubber  
234 stopper at the rear of the chamber facilitated shrew transfer to and from the setup, while a  
235 removable partition was placed between the metabolic chamber and tank cover to prevent shrews  
236 from entering and exiting the water while pre- and post-dive metabolic measurements were  
237 recorded.

238 An outlet port was installed in the top/rear portion of the metabolic chamber while six inlet  
239 holes, each 1 mm in diameter, were drilled into the base of the chamber at the opposite end to  
240 facilitate mixing of air. Air was drawn sequentially at  $\sim 500 \text{ mL min}^{-1}$  from the chamber and  
241 through a column of Drierite using a TR-SS1 gas analysis sub-sampler (Sable Systems Inc., Las  
242 Vegas, USA) calibrated against a bubble flowmeter (accurate to within  $\pm 2\%$ ; Levy 1964). A  
243 subsample of this dry exhalent gas was analyzed using an Applied Electrochemistry S-3A O<sub>2</sub>  
244 analyzer. Fractional O<sub>2</sub> content was recorded at 1-sec intervals, while water ( $T_w$ ) and chamber  
245 temperature ( $T_a$ ) were recorded immediately prior to and following each trial. A respiratory  
246 quotient of 0.83 was assumed, based on an earlier study of fasted water shrews (Gusztak et al.  
247 2005), and instantaneous  $\dot{V}O_2$  derived following the method of Bartholomew et al. (1981).  
248 Mean instantaneous  $\dot{V}O_2$  measurements were calculated at 20-sec intervals throughout the trial.  
249 Body temperature signals were recorded on a Sony Cassette-Recorder and subsequently  
250 analyzed at 1-min intervals throughout the pre-trial, diving, and post-trial periods, respectively.

251 Concrete blocks and sections of ABS tubing were placed at the bottom of the tank to  
252 encourage longer exploratory dives, since preliminary trials suggested these objects increased  
253 time under water. Each shrew completed a total of four trials presented in random order: two in

254 10°C water and two in 30°C water. Trials conducted at 30°C provided an estimated DMR when  
255 thermoregulatory costs are presumably minimal (MacArthur 1989), while 10°C water was  
256 chosen to assess the thermoregulatory costs associated with submersion in cold water.

257 The mass of each shrew (corrected for telemeter mass) was recorded immediately before  
258 placing the animal in the metabolic chamber. Each trial consisted of a 10- to 15-min pre-trial  
259 period during which time the shrew was confined to the metabolic chamber and its lowest  $\dot{V}O_2$   
260 over 5 min taken as the baseline value. After the partition was removed, 10 min was allotted for  
261 voluntary diving, which commenced upon the animal's first entry into the water. At the end of  
262 the 10-min dive session, the partition was gently slid back into place to prevent further dives.  
263 The post-dive recovery  $\dot{V}O_2$  associated with re-warming and grooming was recorded until the  
264 animal's  $\dot{V}O_2$  or  $T_b$  returned to within 95% of the pre-trial baseline. If this had not occurred  
265 after 15 min in the chamber, the trial was ended. Dive durations, grooming behavior, and  
266 relative activity were recorded on a Sony Microcassette-Recorder and analyzed after each trial.

267

### 268 *Body Oxygen Stores*

269 The total body oxygen stores of water shrews were determined after completing all  
270 diving/behavioral trials on each animal, while short-tailed shrews were allowed a 1- to 3-week  
271 acclimation period in the lab prior to determining their oxygen reserves. The mass of each shrew  
272 was recorded, after which the animal was deeply anesthetized with 3% Isoflurane inhalant  
273 anesthetic. A cardiac puncture was then performed to extract a blood sample for hemoglobin and  
274 hematocrit determinations (MacArthur 1984b; McIntyre et al. 2002), followed by euthanization  
275 via an overdose of Isoflurane. The heart, forelimb, and hindlimb muscles were then quickly  
276 removed and freeze-clamped in liquid nitrogen. Excised muscles were stored at -70°C and

277 myoglobin content and buffering capacity determined later following the methods of Reynafarje  
278 (1963) and Castellini et al. (1981), respectively. The lungs were carefully removed after the  
279 majority of the heart muscle had been cut away, and lung volume determined gravimetrically  
280 following the procedures described by Weibel (1970/71). This involved inserting a 3-cm section  
281 of P20 cannula 5-8 mm into the trachea, with the cannula secured in place with a 5-0 silk ligature.  
282 Vetbond™ was applied to the knot at the juncture of the cannula/trachea to ensure the preparation  
283 would not slip. The trachea/lung prep was submerged in saline (0.9 M NaCl) and then inflated at  
284 a constant pressure of 20 mmHg with humidified air for ~10–15 min before measurement. All  
285 volume measurements were corrected to STPD.

286 The total percentage of muscle mass, expressed as a fraction of digesta-free body mass, was  
287 also calculated for 12 water shrews and two short-tailed shrews. Skinned, eviscerated carcasses  
288 were submerged for ~24–48 hr in a detergent solution at 32°C to detach any skeletal muscle  
289 adhering to the bones. The total skeletal muscle mass was then calculated by subtracting the  
290 bone mass from the initial carcass mass (MacArthur et al. 2001; McIntyre et al. 2002).

291 Total blood volume of water shrews was estimated from the allometric equation of Prothero  
292 (1980): blood volume (mL)=76 M<sup>1.0</sup>, where M=body mass in kg. Total body O<sub>2</sub> stores (mL O<sub>2</sub>  
293 in muscle, blood and lungs, corrected to STPD) of *S. palustris* were determined following the  
294 procedures of Lenfant et al. (1970). This method assumes that water shrews dive with lungs  
295 fully inflated and with an initial lung oxygen concentration of 15%. The oxygen storage  
296 capacity of blood was calculated by assuming that 1/3 and 2/3 of the blood volume constituted  
297 the arterial and venous fractions, respectively, with the former having an oxygen saturation of  
298 95% and the latter a 5% vol. decrease in O<sub>2</sub> content compared to arterial blood. Skeletal muscle  
299 myoglobin reserves were determined as the mean concentration of forelimb and hindlimb

300 samples for each individual, multiplied by the estimated mass of skeletal muscle in the body.  
301 Blood and myoglobin oxygen capacities were presumed to equal 1.34 mL O<sub>2</sub> g pigment<sup>-1</sup>  
302 (Lenfant et al. 1970; Kooyman et al. 1983).

303 Total body oxygen stores were divided by the mean DMR (mL O<sub>2</sub> sec<sup>-1</sup>) measured in 10 and  
304 30°C water, in order to derive a cADL for water shrews diving at each T<sub>w</sub>. This estimate hinges  
305 on the assumption that all O<sub>2</sub> stores are utilized during diving, before the animal switches to  
306 anaerobic respiration (Kooyman et al. 1980). We also calculated the behavioral ADL (bADL)  
307 at each T<sub>w</sub>, defined as the dive duration exceeded by only 5% of all voluntary dives (Kooyman  
308 et al. 1983).

309

### 310 *Skeletal Muscle Buffering Capacity*

311 The skeletal muscle buffering capacities of short-tailed and water shrews were tested against non-  
312 bicarbonate buffers following the procedure of Castellini et al. (1981). Buffering capacity (β) was  
313 standardized to represent the μmol of base needed to increase the pH of 1 g of wet muscle mass  
314 from a pH of 6 to 7. A 0.3- to 0.5-g sample of frozen skeletal muscle comprised of a mixture of  
315 forearm and hindlimb tissue was ground up in 0.9 M NaCl, following which the solution was  
316 titrated with 0.2 M NaOH using an Accumet<sup>®</sup> AB 15/15+ pH meter and an AccuTupH sensing  
317 electrode.

318

### 319 *Statistical Analyses of Data*

320 All statistical analyses were performed using SPSS 9.0 for Windows. Means of dive variables were  
321 compared across water temperatures using one-way ANOVA, while two-way ANOVA was  
322 employed to test for possible interaction effects between T<sub>w</sub> and the presence or absence of an

323 implanted transmitter in the subject animal. When appropriate, differences between means were  
324 compared using Tukey's multiple range test. Dive profiles were compared between implanted and  
325 non-implanted adult water shrews using the log likelihood ratio test (G-test, Zar 1974). Means of  
326 variables were compared using a 1-tailed Students *t*-test. Regression lines were fitted by the  
327 method of least squares. Significance was set at 5% and means presented as  $\pm 1$  SE.

328

## 329 **Results**

### 330 *Voluntary Dive Behavior*

331 In most trials, water shrews were hesitant to dive until they had fully explored the surfaces of both  
332 the terrestrial and aquatic sections of the tank. Subsequently, predictable pre-dive behavior was  
333 routinely observed. Water shrews would approach and pause at the edge of the dive platform for  
334 1–10 sec, during which time repetitive head nodding occurred, causing the shrew's vibrissae to  
335 repeatedly touch the water. This behavior was typically followed by the shrew diving from the  
336 platform.

337 Water shrews engaged in two distinct categories of dives. Dives were classified as either  
338 shallow (<10 cm) or deep (reaching the tank bottom at 60 cm). Very few dives were completed  
339 between these depths, but if they occurred, were specified as shallow. During each 20-min dive  
340 trial, the mean number of dives completed during the first 5-min was significantly greater than  
341 for any of the three remaining 5-min periods ( $F_{3,92}=27.466$ ,  $P<0.0001$ ), with ~50% of voluntary  
342 dives occurring during the first 5 min of the trial (supplemental Fig. 2).

343 During each 20-minute trial, shrews completed, on average, 14.7 dives (range=0 to 53 dives).  
344 No significant differences in diving duration or dive frequencies were found between juvenile  
345 and adult water shrews, nor between radio-implanted and non-implanted individuals (see

346 below), and hence all data were pooled for subsequent analyses. The mean dive time of 25  
347 shrews (111 individual dive trials) was  $5.1 \pm 0.1$  sec (supplemental Fig. 3), with a median of 4.5  
348 sec. Of the 1584 recorded voluntary dives, 311 (19.6%) were deep dives with an average  
349 duration of  $8.1 \pm 0.2$  sec. The five longest dives of each trial had a mean duration of  $7.8 \pm 0.3$  sec,  
350 while the mean longest dive per trial was  $10.3 \pm 0.4$  sec. Only three dives exceeding 20 sec, with  
351 the longest voluntary dive recorded being 23.7 sec.

352 The average dive:surface ratio was  $0.21 \pm 0.01$  sec. While short dives were often immediately  
353 followed by another dive, all dives  $>13$  sec were accompanied by an extended ( $>30$  sec) surface  
354 interval (supplemental Fig. 4). There was also a significant increase in the inter-dive surface  
355 time with longer dives, suggesting that longer dives require a longer recovery period than  
356 shorter dives ( $F_{1,952}=20.280$ ,  $P<0.0001$ ,  $r^2=0.021$ ). This relationship held when the longest  
357 dives ( $>20$  sec) were removed from the analysis ( $F_{1,950}=14.594$ ,  $P<0.0001$ ,  $r^2=0.015$ ).

358

### 359 *Influence of Water Temperature on Dive Behavior*

360 A total of 18 shrews completed voluntary dive trials at all four water temperatures. For all dives  
361 combined, dive frequency was independent of  $T_w$  ( $F_{3,67}=0.467$ ,  $P=0.706$ ). However,  $T_w$   
362 significantly influenced the total time water shrews spent swimming and diving ( $F_{3,67}=7.892$ ,  
363  $P<0.001$ ), with shrews voluntarily spending less than half as long in  $3^\circ\text{C}$  compared to  $30^\circ\text{C}$  water  
364 (Table 1). Mean dive duration increased with  $T_w$  ( $F_{3,67}=5.033$ ,  $P=0.003$ ; Fig. 1) as did the  
365 dive:surface ratio ( $F_{3,67}=7.146$ ,  $P<0.001$ ). On average, shrews surfaced for 101 s and 66 sec before  
366 diving again in  $3$  and  $30^\circ\text{C}$  water, respectively.  $T_w$  also affected both the five longest ( $F_{3,67}=5.229$ ,  
367  $P=0.003$ ) and single longest dive of each trial ( $F_{3,67}=5.866$ ,  $P=0.001$ ), with water shrews diving



368 an average of 35% longer in 30°C compared to 3°C water (Fig. 1). The bADL of water shrews  
369 progressively increased from 8.8 sec in 3°C water to 12.2 sec in 30°C water.

370

### 371 *Influence of Transmitter Implants on Dive Performance*

372 Dive performance was compared in water shrews with ( $N=6$ ) and without ( $N=6$ ) an implanted 1.0-  
373 g abdominal temperature transmitter by first pooling the dive data for each group across all  $T_w$ 's.  
374 There were no significant differences in dive performance between the two groups in any of the  
375 examined variables (supplemental Table 1). The frequency distribution of dives by implanted and  
376 non-implanted shrews was also compared for dives times of 0 to 15 sec, using log likelihood ratios  
377 to ensure the calculated mean value was not influenced significantly by outliers (supplemental  
378 Table 2). Again, no significant difference was found between implanted and non-implanted water  
379 shrews ( $G$  value=2.78,  $df=5$ ,  $P>0.50$ ).

380 We also determined if the dive behavior of water shrews was significantly influenced by the  
381 interaction of transmitter effect and  $T_w$ , using a 2-way ANOVA. No significant interaction  
382 effects were found for any variable, including dive duration ( $F_{3,40}=1.013$ ,  $P=0.397$ ), dive  
383 frequency ( $F_{3,40}=0.304$ ,  $P=0.822$ ), dive:surface ratio ( $F_{3,35}=0.378$ ,  $P=0.770$ ), deep dive duration  
384 ( $F_{3,30}=1.182$ ,  $P=0.333$ ), deep dive frequency ( $F_{3,40}=0.032$ ,  $P=0.992$ ), dive:surface ratio of deep  
385 dives ( $F_{3,20}=0.409$ ,  $P=0.748$ ), the longest dive for each trial ( $F_{3,40}=0.659$ ,  $P=0.582$ ), and the  
386 total time in water ( $F_{3,40}=2.321$ ,  $P=0.0898$ ).

387

### 388 *Body Temperature Patterns of Implanted Shrews During Voluntary Diving*

389 A total of 23  $T_b$  data sets were obtained from six water shrews that completed a total of 24 dive  
390 trials. Owing to a mechanical error with the recording device, no  $T_b$  data were obtained for one

391 water shrew diving in 10°C water, though behavioral dive data were collected for this animal.  
392 Water shrews usually incurred the largest drop in  $T_b$  during the first 5–7 min of each trial, but the  
393 decrease varied with  $T_w$  (Fig. 2). Following this initial curvilinear decline,  $T_b$  tended to plateau  
394 and was regulated near 38.8°C for the remainder of the dive trial. The lowest recorded  $T_b$  during  
395 the diving session did not differ significantly between  $T_w$ 's ( $F_{3,19}=2.341$ ,  $P=0.11$ ). Water shrews  
396 quickly elevated their  $T_b$  during the post-trial period, and attained a  $T_b$  similar to the pre-trial value  
397 regardless of  $T_w$  (Table 2; Fig. 2).

398

### 399 *24-Hour Dive Trials*

400 Body temperature profiles and entry and exit times to and from the water were obtained from five  
401 shrews studied in the 12- to 28-hr trials. However, reliable submergence times were only obtained  
402 for three of the trials due to differences in camera position. While substantial variability was  
403 apparent, foraging activities were typically clustered into discrete bouts that consisted of  $9.9\pm 2.5$   
404 aquatic excursions and lasted  $38.1\pm 9.1$  min each, with individual bouts separated by  $65.7\pm 8.8$  min.  
405 Water shrews entered the water an average of 141 times per 24-hr period (range: 92-212) with a  
406 prey capture success rate of 28.6%, or 40 prey items per day. The dive times of shrews actively  
407 foraging in the simulated riverbank enclosure were skewed towards longer duration dives (Fig. 3)  
408 than observed in the 20-min trials (Fig. 1). Consequently, the mean dive duration in the former set  
409 up ( $6.9\pm 0.2$  sec;  $n=227$ ) was not only significantly longer than that of water shrews voluntary  
410 diving in 3°C water with no access to food (4.0 sec;  $t=12.25$ ,  $df=482$ ,  $P<0.0001$ ), but also longer  
411 than the mean dive duration of dives completed at the four different water temperatures (5.1 sec;  
412  $t=7.92$ ,  $df=809$ ,  $P<0.0001$ ). Despite the right-shifted distribution, an abrupt drop in dive duration  
413 occurred between 9 and 11 sec yielding a bADL of 10.7 sec (Fig 3).

414 Body temperature profiles of free-ranging shrews exhibited several consistent patterns over  
415 the course of the trials. Principal among these was a sharp elevation in  $T_b$  by  $\sim 1.2^\circ\text{C}$  in the  $\sim 10$   
416 min period immediately prior to initiating each aquatic foraging bout (Fig. 4). Consequently,  
417 mean  $T_b$  often averaged  $>39.0^\circ\text{C}$  at the commencement of the first dive, though routinely  
418 dropped by  $0.2\text{--}0.4^\circ\text{C}$  upon exiting the water which was followed by a further reduction in  $T_b$   
419 ( $\sim 0.5$  to  $1.0^\circ\text{C}$ ). While shrews occasionally initiated another dive at  $T_b$ 's  $<37.5^\circ\text{C}$ , in most cases  
420  $T_b$  was sharply increased again prior to the next entry into water (Fig. 5 and supplemental Fig.  
421 5). During the interbout intervals activity was minimal and core  $T_b$  was regulated near  $37.5^\circ\text{C}$ .

422

#### 423 *Diving Metabolic Rate*

424 The costs of repetitive diving and re-warming were determined for 12 implanted water shrews that  
425 completed 525 dives over 48 trials. Reliable  $T_b$  measurements were not obtained for 6 of the 48  
426 trials, due to weak/absent signals from some transmitters. During the 10-min period available for  
427 voluntary diving, shrews spent an average of  $51\pm 7$  sec (8.5% of total time) and  $78\pm 10$  sec (13%  
428 of total time) diving in  $10$  and  $30^\circ\text{C}$  water, respectively ( $t=2.24$ ,  $df=38$ ,  $P=0.01$ ). As with the  
429 behavioral dive trials (see above), mean dive time in  $10^\circ\text{C}$  water ( $3.8\pm 0.2$  sec;  $n=256$ ) was  
430 significantly shorter than during the  $30^\circ\text{C}$  metabolic trials ( $5.4\pm 0.3$  sec;  $n=269$ ) ( $t=2.54$ ,  $df=32$ ,  
431  $P=0.007$ ).

432 Integrity of the fur air boundary layer and level of activity in the metabolic chamber were  
433 both found to significantly affect  $T_b$  and increase recorded DMR estimates (data not shown).  
434 Consequently, we only utilized DMR values from water shrews whose pelage did not show  
435 evidence of wetting during the trial and that displayed minimal terrestrial activity (Fig. 6). This  
436 resulted in estimates of DMR in only 13 of the 48 trials (five and nine from the  $10^\circ\text{C}$  and  $30^\circ\text{C}$

437 trials, respectively). The mean DMR for shrews diving in 10°C water ( $8.77 \pm 0.30 \text{ mL O}_2 \text{ g}^{-1} \text{ hr}^{-1}$ )  
438 <sup>1</sup>) was 1.33× greater than that in 30°C water ( $6.57 \pm 0.27 \text{ mL O}_2 \text{ g}^{-1} \text{ hr}^{-1}$ ).

439

#### 440 *Testing for Adaptive Hypothermia*

441 Both regional heterothermy (peripheral hypothermy) and adaptive hypothermia have been  
442 forwarded as mechanisms that allow air breathing divers to extend their aerobic dive durations via  
443 temperature ( $Q_{10}$ ) induced reductions in metabolism (Favilla and Costa 2020). While it is unlikely  
444 that small-bodied water shrews can sustain meaningful peripheral heterothermy, reductions in core  
445  $T_b$  may potentially allow them to extend their underwater endurance. Thus, voluntary dive times  
446 and concomitant core  $T_b$  were analyzed to test for potential linkages between these variables. We  
447 first plotted dive duration against  $T_b$  to determine if shrews with lower  $T_b$ 's dove longer in cold  
448 water. To maximize the data set, dive data were combined for shrews completing voluntary dive  
449 trials in 3°C and 10°C water and for shrews completing the DMR trials in 10°C water. A  
450 statistically significant negative relationship was found between dive duration and  $T_b$  ( $r^2=0.0795$ ,  
451  $P<0.0001$ ,  $n=309$ ; Fig. 7a). Notably, shrews freely foraging in 3°C water in the semi-natural  
452 environment exhibited a similar trend ( $r^2=0.0461$ ,  $P=0.0103$ ; Fig. 7b). However, a true measure of  
453 adaptive hypothermia should reflect reductions in core  $T_b$  being accompanied by a greater  
454 proportion of dive times above the cADL. Limiting these regression analyses to only voluntary  
455 dives that exceeded the predicted cADL at these temperatures (~10 sec) did not return significant  
456 correlations ( $r^2=0.002$ ,  $P=0.801$ ,  $n=27$  and  $r^2=0.001$ ,  $P=0.871$ ,  $n=28$ , respectively). Indeed, water  
457 shrews were reluctant to dive when cool, with few dives occurring at  $T_b$ 's  $<37.5^\circ\text{C}$  (Figs. 7c, d).

458

#### 459 *Body Oxygen Stores and Muscle Buffering Capacity*

460 Myoglobin concentration did not differ significantly between forelimb and hindlimb samples for  
461 either adults or juveniles in the two shrew species sampled (Table 3). The mean (forelimb and  
462 hindlimb) myoglobin concentration (mg g of wet tissue<sup>-1</sup>) of adult water shrews (6.04±0.25; *N*=9)  
463 was significantly higher than in juveniles (3.76±0.12; *N*=10; *t*=7.074, *df*=18, *P*<0.0001) and nearly  
464 2× greater than for adult short-tailed shrews (3.03±0.12; *N*=9; *t*=7.624, *df*=17, *P*<0.0001). Skeletal  
465 muscle buffering capacity exhibited a similar trend, with adult water shrews having a higher value  
466 (38.22±2.28 β; *N*=13) than either juvenile water shrews (30.67±2.34 β; *N*=11; *t*=2.395, *df*=22,  
467 *P*=0.012) or adult short-tailed shrews (24.88±1.40 β; *N*=10; *t*=4.808, *df*=21, *P*<0.0001).

468 Recorded lung volumes of adult (4.57±0.28 mL STPD 100 g<sup>-1</sup>; *N*=5) and juvenile (4.55±0.18  
469 mL STPD 100 g<sup>-1</sup>; *N*=9) water shrews were similar (Table 3). These values are ~1.1× greater  
470 than predicted by allometry (Stahl 1967) for a mammal of 15.2 g (adult) and 14.1 g (juvenile).  
471 Lung volumes of adult short-tailed shrews (3.34±0.07 mL STPD 100 g<sup>-1</sup>; *N*=6) were  
472 significantly less than those recorded for adult water shrews (*t*=7.401, *df*=9, *P*<0.0001) and 6%  
473 less than that predicted by allometry for a 22.8 g mammal.

474 Total blood oxygen capacity of adult and juvenile water shrews was high, averaging  
475 26.93±0.58 and 26.38±1.37 vol. %, respectively (Table 3), with adult water shrews having a  
476 significantly higher blood oxygen capacity than adult short-tailed shrews (23.18±0.84 vol. %;  
477 *t*=0.896, *df*=9, *P*<0.0001). Hematocrit levels were high in both adult water shrews (50.23±1.33)  
478 and short-tailed shrews (48.78±2.50), and did not differ statistically between the two species  
479 (*t*=0.735, *df*=21, *P*<0.235). The calculated total O<sub>2</sub> storage capacity of summer-caught adult  
480 and juvenile water shrews was 26.31 and 24.06 mL O<sub>2</sub> STPD kg<sup>-1</sup>, respectively (Table 4). The  
481 mass-specific O<sub>2</sub> storage capacity of summer-caught adult water shrews was 1.31× greater than  
482 that of adult short-tailed shrews (Table 4). The largest single contributor to total O<sub>2</sub> stores in

483 adults of both shrew species was O<sub>2</sub> bound to hemoglobin in the blood, accounting for 62.5%  
484 and 68.5% in water shrews and short-tailed shrews, respectively.

485

#### 486 *Calculated Aerobic Dive Limit*

487 Assuming that diving animals fully deplete their O<sub>2</sub> reserves before initiating anaerobic respiration,  
488 and using the DMR estimate of 6.57 mL O<sub>2</sub> g<sup>-1</sup> hr<sup>-1</sup> in 30°C water, adult and juvenile American  
489 water shrews have cADLs of 14.4 and 13.2 sec, respectively (Table 4). This value is consistent  
490 with the estimated bADL at 30°C (12.2 sec), determined from voluntary dive profiles ( $n=303$   
491 dives; Fig. 1). Due to an increased DMR in 10°C water (8.77 mL O<sub>2</sub> g<sup>-1</sup> hr<sup>-1</sup>), the cADL for adult  
492 and juvenile water shrews is 10.8 and 9.9 sec, respectively (Table 4). Again, these calculated limits  
493 closely match the bADL (10.2 sec) determined for water shrews diving in 10°C water ( $n=258$   
494 dives; Fig. 1). Only 3.9% and 2.3% of voluntary dives in 10°C and 30°C water, respectively,  
495 exceeded the cADLs for adult *S. palustris*.

496

#### 497 **Discussion**

498 As predicted by allometry, the diminutive size of *S. palustris* in this study (mean=14.0 g) appeared  
499 to severely limit the species' aerobic dive endurance. Indeed, adult water shrews were found to  
500 exhibit the smallest total oxygen storage capacity (0.37 mL O<sub>2</sub>), the highest mass-specific DMR  
501 (6.57–8.77 mL O<sub>2</sub> g<sup>-1</sup> hr<sup>-1</sup>), and lowest cADL (10.8–14.4 sec) of any mammalian diver studied to  
502 date. Moreover, water shrews have the highest surface-area-to-volume ratio of any endothermic  
503 diver, which should make them extremely susceptible to immersion hypothermia (MacArthur  
504 1989). It is truly remarkable then, that this small insectivore can efficiently utilize aquatic foraging  
505 as a means to sustain its inherently high rate of heat production, since aquatic foraging is known

506 to be one of the most energetically costly methods of foraging (Fish 2000). This energetic burden  
507 is highlighted by the observation that captive American water shrews in relatively warm terrestrial  
508 settings ( $\sim 20^{\circ}\text{C}$ ) must consume at least their body weight in prey on a daily basis (Gusztak et al.  
509 2005). This level of food consumption could conceivably be doubled or tripled in free-living  
510 individuals during the winter months.

511

### 512 *Body Oxygen Stores and Muscle Buffering Capacity*

513 Divers are known for their physiological adaptations to increase breath-hold capacity, especially  
514 those relating to their disproportionately large body oxygen stores (Butler and Jones 1997; Favilla  
515 and Costa 2020). Not surprisingly, the mass-specific oxygen stores of water shrews were  $\sim 30\%$   
516 greater than those of strictly terrestrial short-tailed shrews. Many researchers in this field consider  
517 the primary indicator of a diver's breath-hold capacity to be its muscle oxymyoglobin  
518 concentration (Kooyman and Ponganis 1998, Ponganis et al. 1999; Mirceta et al. 2013). Adult *S.*  
519 *palustris* appears not to follow this trend as myoglobin accounts for only 12.4% of total body  $\text{O}_2$   
520 stores, which is similar to that of alcids ( $\sim 5\text{-}10\%$ ), but substantially lower than values ( $\sim 30$  to  $50\%$ )  
521 reported for various pinnipeds and toothed whales (Elliott et al. 2010; Favilla and Costa 2020).  
522 Moreover, skeletal muscle myoglobin concentration of adult water shrews ( $0.60 \text{ g } 100 \text{ g}^{-1}$ ; Table  
523 3) is only half that recorded for other semi-aquatic mammals: star-nosed moles ( $1.36 \text{ g } 100 \text{ g}^{-1}$ ;  
524 McIntyre et al. 2002), muskrats ( $1.21\text{--}1.38 \text{ g } 100 \text{ g}^{-1}$ ; MacArthur et al. 2001), and beaver ( $1.2 \text{ g}$   
525  $100 \text{ g}^{-1}$ ; McKean and Carlton 1977). Similar to other divers, however, myoglobin stores are  
526 relatively slow to develop as values for juvenile ( $<4$ -month old) water shrews were  $\sim 62\%$  those of  
527 adults, and only accounted for 7.7% of total body  $\text{O}_2$  storage capacity.

528 The relatively low myoglobin concentrations in small-bodied alcid and semi-aquatic  
529 mammals likely arises from functional constraints imposed by muscle fiber types and relatively  
530 high mitochondrial volumes (Weibel 1985; Ordway and Garry 2004) that limit maximal  
531 attainable levels in muscle. Nonetheless, skeletal muscle myoglobin concentrations of adult  
532 water shrews are 2–4× that of strictly terrestrial short-tailed (0.16 to 0.30 g 100 g<sup>-1</sup>; Stewart et  
533 al. 2005 and Table 3) and Etruscan shrews, *Suncus etruscus* (0.15 g 100 g<sup>-1</sup>; Jürgens 2002),  
534 suggesting an adaptive increase associated with diving. This difference appears to be linked to  
535 the marked increase in the net surface charge of *S. palustris* myoglobin versus those of non-  
536 diving shrews, which is proposed to foster higher myoglobin concentrations by minimizing the  
537 potential for newly synthesized (apomyoglobin) and mature protein chains from  
538 aggregating/precipitating (Mirceta et al. 2013; Samuel et al. 2015; He et al. 2021). Of note, the  
539 highest myoglobin concentrations were found in the heart for both short-tailed (0.88 g 100 g<sup>-1</sup>)  
540 and water shrews (1.10 g 100 g<sup>-1</sup>). This finding presumably highlights a key role for this  
541 respiratory pigment in supporting the exceptionally high heart rates (>750 beats per minute) of  
542 shrews (Doremus 1965; Vornanen 1992), though this feature may also help extend aerobic  
543 metabolism of this tissue during long dives by water shrews.

544 The water shrew is able to compensate for its low skeletal muscle myoglobin concentration  
545 owing to the potential gain in O<sub>2</sub> stores in the lungs and, especially, the blood. The mean lung  
546 volume of adult water shrews (4.57 mL STPD 100 g<sup>-1</sup>; Table 3) was ~1.1× greater than  
547 predicted by allometry for a 15.2 g mammal (Stahl 1967). Further, this species has a mass-  
548 specific pulmonary O<sub>2</sub> storage capacity that is 1.37× greater than for adult short-tailed shrews.  
549 The mass-specific lung volume of the American water shrew is also larger than for other shrews  
550 studied, including, *N. fodiens*, *Sorex minutus*, and *Suncus etruscus* with respective lung volumes



551 of 3.56, 3.81, and 4.02 mL STPD 100 g<sup>-1</sup> (Gehr et al. 1981). The moderately higher lung O<sub>2</sub>  
552 stores of *S. palustris* could serve to increase buoyancy, as well as provide an important source  
553 of O<sub>2</sub> while diving. It should also be noted that underwater sniffing plays an important role in  
554 food acquisition for this species (Catania 2006; Catania et al. 2008). In this context, the enlarged  
555 lungs of American water shrews may at least partially compensate for exhaled gas bubbles lost  
556 incidental to underwater sniffing (Gustak, unpublished observations). However, lung volume  
557 of *S. palustris* is almost half that of the adult star-nosed moles (8.1 mL STPD 100 g<sup>-1</sup>; McIntyre  
558 et al. 2002), which also exploits underwater olfaction (Catania 2006). Another relevant  
559 observation is that submerged water shrews would routinely inspire trapped gas released from  
560 their fur that coalesced under the Plexiglas cover during the initial training sessions. This  
561 finding implies an ability to re-breathe air bubbles trapped under the ice during winter foraging  
562 in order to extend submergence times as has been observed in muskrats (MacArthur 1992).  
563 Since water shrews commonly co-habit waterways with beavers and muskrats (Conaway 1952),  
564 it is expected that bubbles can similarly be exploited by *S. palustris* diving under the ice.

565 By far, the most important source of O<sub>2</sub> for a diving water shrew is the large reserve in the  
566 blood, which comprises 62.5–66.2% of this diver's O<sub>2</sub> storage capacity. This is reflected in their  
567 high hemoglobin (19.9 g 100 mL<sup>-1</sup>) and hematocrit (50.4%) values, with the former resulting  
568 in a mean blood O<sub>2</sub> capacity of 26.9 vol. % for an adult water shrew. Many species of shrews  
569 examined to date have high recorded hemoglobin (range: 15–18 g 100 mL<sup>-1</sup>) and hematocrit  
570 values (range: 45–50%), some of which are near the upper limits recorded for any mammal  
571 (Wolk 1974; Gehr et al. 1981). Even so, the blood O<sub>2</sub> capacity calculated for the American  
572 water shrew is the highest value recorded of any soricid, including the European water shrew  
573 (23.9 vol. %; Wolk 1974), the Etruscan shrew (23.3 vol. %; Bartels et al. 1979) and adult

574 short-tailed shrew (23.2 vol. %; Table 3). Adult water shrews also exhibited a higher blood O<sub>2</sub>  
575 capacity than other semi-aquatic divers studied to date, including adult star-nosed moles (23.0  
576 vol. %; McIntyre et al. 2002) and muskrats (24.1 vol. %; MacArthur et al. 2001).

577 Buffering capacity of skeletal muscle has been shown to increase with increasing body mass  
578 and is also important for prolonging burst activity in species utilizing sprinting (Castellini et al.  
579 1981; Hochachka and Mommsen 1983). Specifically, elevated buffering capacity is correlated  
580 with Type IIA and IIB fast-twitch muscle fibers, which are found in higher concentrations in  
581 mammals that exploit burst activity (Abe 2000; Nakagawa and Hattori 2002). In anaerobic or  
582 severely hypoxic conditions, as may be encountered during prolonged diving or for shorter  
583 periods of time during sprinting, glycolysis is the only, albeit inefficient, means of ATP  
584 production. This process is inhibited if intracellular pH drops too low, therefore intracellular  
585 buffers are critical to ensure an optimum pH for glycolysis to occur while exercising in low O<sub>2</sub>  
586 environments. Adult water shrews have a skeletal muscle buffering capacity (38.2 β) that is  
587 1.2× greater than for sub-adult water shrews and significantly greater (1.5-fold) than for adult  
588 short-tailed shrews. Although allometric scaling of glycolytic enzymes to mass predicts that  
589 water shrews should have the poorest ability of any diver to utilize anaerobic glycogenolysis  
590 (Emmett and Hochachka 1981), adult water shrew values were similar to platypus (38.2 β;  
591 Evans et al. 1994), star-nosed moles (44.1 β; McIntyre et al. 2002) and summer-caught adult  
592 muskrats (51.5 β; MacArthur et al. 2001). Since few voluntary dives by water shrews exceeded  
593 the cADL, glycolytic pathways probably do not play a large role in the majority of dives  
594 completed by this species. Instead, their elevated muscle buffer capacity presumably attenuates  
595 tissue pH changes arising from the rapid rate of CO<sub>2</sub> accumulation during aerobic breath hold

596 dives, though it may also be important for their flush-pursuit aquatic foraging strategy that  
597 involves periods of brief, intense motor activity (Catania et al. 2008).

598

#### 599 *Diving Metabolic Rate*

600 Consistent with allometric predictions, the American water shrew has the highest recorded DMR  
601 of any diver (6.57 and 8.77 mL O<sub>2</sub> g<sup>-1</sup> hr<sup>-1</sup> in 30°C and 10°C water, respectively). The high DMR  
602 of *S. palustris* reflects in part its inherently high mass-specific BMR (4.84 mL O<sub>2</sub> g<sup>-1</sup> hr<sup>-1</sup>; Gusztak  
603 et al. 2005), as well as the rapid limb strokes, high buoyancy, and disproportionately high drag  
604 while diving due to the species' high mass-specific surface area. However, the DMR of *S. palustris*  
605 exposed to minimal thermal stress is only 1.4× BMR, which is less than star-nosed moles (2.1×  
606 RMR; McIntyre et al. 2002) and muskrats (2.7× BMR; MacArthur and Krause 1989), but similar  
607 to sea otters diving and capturing prey (1.6× RMR on water; Yeates et al. 2007).

608

#### 609 *Dive Performance*

610 Prior to this study, very little was known about the voluntary breath-hold capacity of *S. palustris*.  
611 Captive *S. palustris* exhibited a mean voluntary dive duration of 5.1 sec during the 20-min dive  
612 trials, which is virtually identical to the value (5.2 sec) reported by McIntyre (2000) for a single  
613 captive shrew, and is consistent with the range (3–6 sec) reported for *N. fodiens* diving in captivity  
614 (Churchfield 1985; Ruthardt and Schröpfer 1985). Vogel (1998) suggested that the dive times of  
615 captive water shrews were probably shorter than those of shrews in the wild due to a small tank  
616 size and absence of aquatic prey. However, we believe that our study provides a reasonably  
617 accurate representation of the American water shrew's dive capacity. Indeed, the mean dive time  
618 of this species (5.1 sec) is longer than predicted from allometry (cf. Fig. 4 of Jordaan et al. 2021).

619 The maximum dive time of 23.7 sec recorded is also virtually identical to that (24 sec) recorded  
620 for a slightly larger European water shrew observed diving in a 2-m deep stream (Scholetch 1980).  
621 That said, dive times in the 20-min dive trials are likely skewed towards shorter dives than  
622 expected in nature. In this context, it is noteworthy that the mean dive duration of water shrews  
623 foraging in an artificial riverbank environment (6.9 sec) was ~75% longer than the mean dive  
624 endurance (4.0 sec) for water shrews voluntary diving in 3°C water (Table 1).

625 Even under laboratory conditions, *S. palustris* is an impressive diver compared to other  
626 small-bodied divers. Another semi-aquatic insectivore, the star-nosed mole, is ~4× larger (50–  
627 60 g) than the water shrew, yet exhibits a mean dive duration that is only 1.8 times greater (9.2  
628 sec; McIntyre et al. 2002). The dipper (*Cinclus mexicanus*) is the smallest avian diver (~50 g)  
629 and its mean recorded voluntary dive time in a natural riparian environment is comparable to  
630 that of star-nosed moles and water shrews (5–15 sec; Murrish 1970). Likewise, the much larger  
631 325–450 g bufflehead (*Bucephala albeola*) has a mean dive time of only 12.5 sec (Gauthier  
632 1993), while mink (850 g) have a mean dive duration of just 9.9 sec (Dunstone and O'Connor  
633 1979). Juvenile (300–500 g) and adult muskrats (650–900 g) exhibited only slightly longer  
634 average dive times (19.2–22.0 sec; MacArthur et al. 2001), while a mean of 31.3 sec was  
635 recorded for 1.5–2.0 kg free-ranging platypus, *Ornithorhynchus anatinus*, diving in a lake  
636 (Bethge et al. 2003).

637 Transmitter mass (1.00–1.16 g) ranged from 6.7–9.7% of total body mass, and did not  
638 surpass the recommended upper limit of 10% recommended by Brander and Cochran (1967).  
639 Radio equipped water shrews did not show any significant changes in dive performance  
640 compared to non-implanted animals. The large volume of air trapped in the pelage probably  
641 accounts for this lack of effect on dive performance. McIntyre (2000) measured the volume of

642 air bound to the pelage in the water shrew and recorded a mass-specific air capacity of 0.35 mL  
643  $\text{g}^{-1}$ , which is greater than in the star-nosed mole (0.19 mL  $\text{g}^{-1}$ ; McIntyre 2000). Not surprisingly,  
644 American water shrews also having a lower specific gravity (0.761), or stronger buoyant force  
645 in water, compared to star-nosed moles (0.826; McIntyre 2000) and muskrats (0.952;  
646 MacArthur 1992), but less than that of European water shrews (0.726; Köhler 1991). The  
647 relatively large amount of air trapped in the pelage of *S. palustris* should increase the energetic  
648 costs of submerging to depth. However, it would also decrease the energetic cost of surfacing  
649 with large prey and shorten the travel time while ascending the water column, thereby lessening  
650 the probability of prey escaping. For instance, captive *S. palustris* were routinely observed  
651 passively surfacing with 2–3 g crayfish captured at the bottom of a 30-cm tank (Gusztak,  
652 unpublished observations). Likewise, Köhler (1991) recorded that *N. fodiens* could retrieve a  
653 12.8 g lead-filled snail shell from the tank bottom.

654

#### 655 *Aerobic Dive Limits and Diving Behavior*

656 The relevance of determining cADL for certain diving species has been called into question since  
657 some large-bodied, benthic divers tend to have a significant number of dives exceeding their  
658 cADL. For instance, deep diving Australian and New Zealand sea lions routinely exceeded their  
659 cADLs by 1.4 and 1.5-fold, respectively (Costa et al. 2001), while beaked whales may exceed their  
660 bADL by an astonishing 2.4 hrs (Quick et al. 2020). By contrast, small amphibious divers <2 kg  
661 submerge to relatively shallow depths with less interspecific variability in dive depth than larger  
662 species, and have been noted to rarely dive beyond their cADL. For instance, the star-nosed mole  
663 (50 g) and muskrat (680 g) only exceeded their cADLs during 2.9% and 6% of all voluntary dives,  
664 respectively (MacArthur et al. 2001; McIntyre et al. 2002). In line with these observations, only

665 3.9% and 2.3% of dives by adult water shrews in 10 and 30°C water exceeded their cADLs,  
666 respectively. Similarly, dive duration frequencies exhibited an abrupt drop between 9 and 11 sec  
667 during the 24-hr trials, yielding a bADL (10.7 sec) virtually identical to the cADL of adult water  
668 shrews diving in 10°C water. Finally, the longest voluntary dive completed by *S. palustris* was  
669 23.7 sec, a duration only 12% greater than the maximum dive time predicted from allometry by  
670 Schreer and Kovacs (1997) for a 16.3 g diver (21.2 sec;  $1.62M^{0.37}$ ), which further suggests strict  
671 adherence to an aerobic diving schedule in this species. Thus, determining the cADL of small-  
672 bodied divers seems to provide a useful estimate of their breath-hold capacity, even though this is  
673 not always the case for larger divers.

674

#### 675 *Influence of Water Temperature on Dive Behavior and Body Temperature*

676 Many small amphibious divers decrease or limit core  $T_b$  cooling behaviorally, by periodically  
677 exiting the water to re-warm. As expected, water shrews demonstrated behavioral  
678 thermoregulation, since it is energetically more efficient to prevent large drops in  $T_b$  than incur the  
679 costs of re-warming from a sharply depressed  $T_b$  (MacArthur 1989; Hindle et al. 2006). Based on  
680 voluntary dive trials in 3, 10, 20, and 30°C water, shrews did not consistently show a statistically  
681 significant difference in any measured variable across adjacent  $T_w$ 's. Instead, for most variables  
682 examined, there was a gradual positive relationship between the behavioral index of dive  
683 performance and increasing  $T_w$ . However, there was a large difference in dive performance  
684 between the two extreme  $T_w$ 's. Comparing 3 and 30°C water, *S. palustris* experienced a 2-fold  
685 increase in the total time spent in water, a 1.5-fold increase in mean dive duration, a 1.6-fold  
686 increase in the longest dive duration, a 1.4-fold increase in deep dive duration, and a  $\sim 3\times$  greater  
687 increase in deep dive frequency. While many other small-bodied semi-aquatic mammals and birds

688 display a similar positive correlation of dive duration and frequency with  $T_w$  (MacArthur 1984a;  
689 de Leeuw et al. 1999; McIntyre et al. 2002), free-diving mink and European beaver do not  
690 (Harrington et al. 2012; Graf et al. 2018). As mentioned earlier, the air boundary surrounding the  
691 water shrew adds buoyancy, but more importantly, acts as a protective insulator to limit transfer  
692 of heat to the water (Vogel 1990; Köhler 1991). Some loss of this air layer is caused by rapid  
693 movements of the appendages while diving, which when combined with increased convective heat  
694 loss results in increased peripheral cooling.

695 Rates of cooling calculated for water shrews voluntarily swimming and diving was  
696 completed over the first 5 min of each trial and averaged  $0.92^{\circ}\text{C min}^{-1}$  in  $10^{\circ}\text{C}$  water. The first  
697 5 min of each trial was chosen because shrews completed a significantly higher number of dives  
698 and had the quickest and largest drop in  $T_b$  during this portion of the diving trial. Using rectal  
699 thermocouples, Calder (1969) calculated cooling rates of *S. palustris* in  $10^{\circ}\text{C}$  water to be  $2.06^{\circ}\text{C}$   
700  $\text{min}^{-1}$  (swimming) and  $2.46^{\circ}\text{C min}^{-1}$  (diving). Shrews in this study likely had lower rates of  
701 cooling because much effort was taken to keep the pelage of the shrews in optimal condition  
702 thereby preserving the integrity of the critical air layer trapped in the fur of diving shrews.

703 Regardless of water temperature, water shrews experienced the greatest drop in  $T_b$  during  
704 the first 5 minutes of each diving trial, which then plateaued near  $38.5\text{--}39.0^{\circ}\text{C}$  for the remaining  
705 15 min. This latter interval was accompanied by a sharp reduction in aquatic activity, suggesting  
706 that water shrews principally rely on behavioral thermoregulation, likely supplemented by a  
707 fully engaged vasopressor response, to limit further declines in  $T_b$  during bouts of aquatic  
708 activity. Similarly, free-ranging muskrats and beavers were observed to maintain core  $T_b$  within  
709  $\pm 1^{\circ}\text{C}$  of normothermic  $T_b$  throughout most semi-aquatic activity, and also appeared to use

710 behavioral thermoregulation to limit body cooling (MacArthur 1979; Dyck and MacArthur  
711 1992).

712 The adaptive hypothermia hypothesis (Butler and Jones 1997) has been advanced to explain  
713 why some divers routinely exceed their cADL. However, the benefit of increased aerobic dive  
714 endurance comes with the mandatory energetic cost of re-warming cooled tissues after diving  
715 and, for small-bodied divers especially, the potential impairment of locomotor function and  
716 foraging efficiency accompanying immersion hypothermia. Studies examining the adaptive  
717 hypothermia tenet have yielded mixed results (Ponganis et al. 2003; Hindle et al. 2006; Niizuma  
718 et al. 2007). Owing to their low O<sub>2</sub> stores, high mass-specific DMR, and rapid rate of heat loss  
719 in water, water shrews might be expected to implement body cooling to prolong their  
720 underwater endurance. Consistent with this suggestion, water shrews in dive trials at 3 and  
721 10°C, and those freely foraging in 3°C water in the semi-natural environment, showed a  
722 statistically significant inverse relationship between dive duration and core T<sub>b</sub>. However,  
723 adaptive hypothermia should manifest as a greater proportion of dive times above the cADL in  
724 animals exhibiting the lowest core temperatures. No significant correlation was found between  
725 T<sub>b</sub> and dive times that exceeded the cADL in either the acute or 24-hr dive trials. More telling  
726 was the finding that dive frequency significantly declined in concert with T<sub>b</sub>, with few dives  
727 occurring at T<sub>b</sub>'s <37.5°C. This observation exemplifies the strict thermoregulatory control *S.*  
728 *palustris* exhibits during aquatic activity, and further suggests that free ranging water shrews  
729 do not utilize hypothermia to extend underwater foraging endurance.

730 In contrast, water shrews required to exclusively feed underwater during the 12- to 28-hr  
731 trials in 3°C water were observed to consistently elevate core body temperature by ~1.0–1.5°C  
732 immediately prior to initiating each aquatic foraging bout. This increase was often apparent



733 while the shrews were quietly perched near the water's edge, and thus was likely fueled by a  
734 combination shivering and non-shivering thermogenesis. The latter mode of heat production  
735 may be especially critical during aquatic foraging bouts, and we have in fact observed large  
736 interscapular brown fat deposits in this species (Gusztak, MacArthur, and Campbell,  
737 unpublished observations). Notably, free-ranging muskrat and Eurasian otter (*Lutra lutra*)  
738 similarly increase  $T_b$  immediately before initiating foraging bouts in cold water (MacArthur  
739 1979; Kruuk et al. 1987), suggesting this phenomenon may be relatively wide-spread among  
740 semi-aquatic mammals. However, owing to the low thermal inertia of water shrews (and the  
741 consumption of relatively large cold prey items), and potentially the release of peripheral  
742 vasoconstriction,  $T_b$  often declined by  $1^\circ\text{C}$  following each dive. This period was accompanied  
743 by vigorous grooming and burrowing in the moss of the chamber such that  $T_b$  generally  
744 increased back to  $38.5\text{--}39.0^\circ\text{C}$  over the ensuing 2 to 4 min before initiating the next aquatic  
745 excursion, as was similarly observed in the 20-min behavioral dive trials. Limited by already  
746 short foraging durations, minor increases in dive time arising from hypothermia are thus  
747 presumably outweighed by the heightened muscle power output afforded by a high  $T_b$  which  
748 likely enhances the already impressive reaction times (20 msec; Catania et al. 2008), and hence  
749 foraging efficiency of this diminutive predator while submerged. As suggested for free-ranging  
750 mink (Harrington et al. 2012), this advantage would be amplified in the physiologically  
751 challenging winter season whereby  $Q_{10}$  driven reductions in prey metabolism presumably  
752 allows these agile warm-blooded predators to capture prey items within the short time windows  
753 ( $\sim 10$  sec) afforded by their inherently low cADLs. Interestingly, the relatively short ( $\sim 65$  min)  
754 interbout intervals closely align with the mean digesta throughput time of this species (50–55  
755 min; Gusztak et al. 2005), thereby facilitating a dozen or more foraging bouts per day.

756

757 *Summary*

758 American water shrews are particularly intriguing from a physiological perspective as allometry  
759 predicts this species should have the smallest total body oxygen storage capacity, highest diving  
760 metabolic rate, lowest skeletal muscle buffering capacity, and lowest anaerobic capability of any  
761 endothermic diver. The water shrew must additionally balance the continual threat of immersion  
762 hypothermia while submerged with the pressure to maximize its aerobic dive endurance and  
763 anaerobic capacity in order to ensure adequate underwater foraging times. This challenge is  
764 presumably greatest in the winter when water shrews must detect and capture prey in ice-cold  
765 water, often in total darkness. Surprisingly, the world's smallest mammalian diver is able to  
766 achieve this feat at least in part by elevating their core  $T_b$  by  $>1^\circ\text{C}$  prior to diving. Despite  
767 increasing the rate of  $\text{O}_2$  use while underwater, this pre-dive hyperthermia likely enhances their  
768 impressive reaction times and set of sensory modalities to efficiently capture energy-rich aquatic  
769 prey within time windows as short as 5 to 10 sec. It may also enhance winter foraging efficiency  
770 not only by enabling faster underwater swim speeds, but by permitting longer foraging bouts in  
771 near-freezing water. This pre-dive response may thus provide a critical margin of safety that  
772 reduces the risk of costly and potentially debilitating hypothermia.

773

774 **Acknowledgments**

775 We thank Chris Schneider, Dean Jeske, Allyson Hindle, and Rob Senkiw for assistance with shrew  
776 trapping and husbandry, and Shane Farrow and Stefan Gusztak for lab assistance. R.W.G. was  
777 supported in part by a University of Manitoba Faculty of Science Undergraduate Student Research  
778 Award, a NSERC Undergraduate Research Award, and a NSERC Postgraduate Scholarship. This

779 research was funded by Natural Sciences and Engineering Research Council (NSERC) Discovery  
780 Grants to R.A.M. and K.L.C.

781

782 **Literature Cited**

783 Abe H. 2000. Review: role of histidine-related compounds as intracellular proton buffering  
784 constituents in vertebrate muscle. *Biochem (Moscow)* 65:757–765.

785 Bartels H., R. Bartels, R. Baumann, R. Fons, and K.D. Jürgens. 1979. Blood oxygen transport  
786 and organ weights of two shrew species *Suncus etrucus* and *Crocidura russula*. *Am J Physiol*  
787 236:R221–R224.

788 Bartholomew G.A., D. Vleck, and C.M. Vleck. 1981. Instantaneous measurements of oxygen  
789 consumption during pre-flight warm-up and post-flight cooling in sphingid and saturniid  
790 moths. *J Exp Biol* 90:17–32.

791 Beneski Jr J.T. and D.W. Stinson 1987. Mammalian species: *Sorex palustris*. *Am Soc Mammal*  
792 296:1–6.

793 Bethge P., S. Munks, H. Otley, and S. Nicol. 2003. Diving behaviour, dive cycles and aerobic  
794 dive limit in the platypus, *Ornithorhynchus anatinus*. *Comp Biochem Physiol A* 136:799–  
795 809.

796 Brander R.B. and W.W. Cochran. 1967. Radio-location telemetry. In R.G. Giles (ed.), *Wildlife*  
797 *Management Techniques*. The Wildlife Society, Washington, D.C.

798 Butler P.J. and D.R. Jones. 1997. Physiology of diving birds and mammals. *Physiol Revs*  
799 77:837–899.

800 Calder W.A. 1969. Temperature relations and under water endurance of the smallest  
801 homeothermic diver, the water shrew. *Comp Biochem Physiol A* 30:1075–1082.

- 802 Calder W.A. 1996. Size, Function, and Life History. Courier Corporation.
- 803 Castellini M.A., G.N. Somero, and G.L. Kooyman. 1981. Glycolytic enzyme activities in tissues  
804 of marine and terrestrial mammals. *Physiol Zool* 54:242–252.
- 805 Catania K.C. 2006. Olfaction: underwater ‘sniffing’ by semi-aquatic mammals. *Nature*  
806 444:1024–1025.
- 807 Catania K.C. 2013. The neurobiology and behavior of the American water shrew (*Sorex*  
808 *palustris*). *J Comp Physiol A* 199: 545–554.
- 809 Catania K.C., J.F. Hare, and K.L. Campbell. 2008. Water shrews detect movement, shape, and  
810 smell to find prey underwater. *Proc Natl Acad Sci* 105:571–576.
- 811 Churchfield S. 1985. The feeding ecology of the European water shrew. *Mammal Rev* 1:13–21.
- 812 Conaway C.H. 1952. Life history of the water shrew (*Sorex palustris navigator*). *Amer Midland*  
813 *Nat* 48:219–248.
- 814 Costa D.P., N.J. Gales, and M.E. Goebel. 2001. Aerobic dive limit: how often does it occur in  
815 nature? *Comp Biochem Physiol A* 129:771–783.
- 816 Dawson T.J. and D. Fanning. 1981. Thermal and energetic problems of semiaquatic mammals: a  
817 study of the Australian water rat, including comparisons with the platypus. *Physiol Zool*  
818 54:285–296.
- 819 Doremus H.M. 1965. Heart rate, temperature and respiration rate of the short-tailed shrew in  
820 captivity. *J Mammal* 46:424–425.
- 821 de Leeuw J.J., M.R. Erden, and G.H. Visser. 1999. Wintering tufted ducks, *Aythya fuligula*,  
822 diving for zebra mussels, *Dreissena polymorpha*, balance feeding costs within narrow  
823 margins of their budget. *J Avian Biol* 30:182–192.

- 824 Dunstone N. and R.J. O’Conner. 1979. Optimal foraging in an amphibious mammal. I. The aqua-  
825 lung effect. *Anim Behav* 27:1182–1194.
- 826 Dyck A.P. and R.A. MacArthur. 1992. Seasonal body temperature and activity in free-ranging  
827 beaver (*Castor canadensis*). *Can J Zool* 70:1668–1672.
- 828 Elliott K.H., A. Shoji, K.L. Campbell, and A.J. Gaston. 2010. Oxygen stores and foraging  
829 behavior of two sympatric, planktivorous auks. *Aquatic Biol* 8:221–235.
- 830 Emmett B. and P.W. Hochachka. 1981. Scaling of oxidative and glycolytic enzymes in  
831 mammals. *Respir Physiol* 45:261–72.
- 832 Evans B.K., D.R. Jones, J. Baldwin, and G.R.J. Gabbott. 1994. Diving ability of the platypus.  
833 *Aust J Zool* 42:17–27.
- 834 Fish F.E. 2000. Biomechanics and energetics in aquatic and semiaquatic mammals: platypus to  
835 whale. *Physiol Biochem Zool* 73:683–698.
- 836 Gauthier G. 1993. Bufflehead (*Bucephala albeola*). In *Birds of North America*, No. 67. A. Poole  
837 and F. Gill, eds. The Academy of Natural Sciences, Philadelphia, PA and The American  
838 Ornithologists’ Union, Washington, D.C.
- 839 Gehr P., D.K. Mwangi, A. Amman, G.M.O. Maloiy, C.R. Taylor, and E.R. Weibel. 1981. Design  
840 of the mammalian respiratory system. V. Scaling morphometric pulmonary diffusion capacity  
841 to body mass: wild and domestic mammals. *Respir Physiol* 44:61–86.
- 842 George S.B., J.R. Choate, and H.H. Genoways 1986. Mammalian species: *Blarina brevicauda*.  
843 *Am Soc Mammal* 261:1–9.
- 844 Graf P.M., R.P. Wilson, L.C. Sanchez, K. Hackländer, and F. Rosell. 2018. Diving behavior in a  
845 free-living, semi-aquatic herbivore, the Eurasian beaver *Castor fiber*. *Ecol Evol* 8:997–1008.

- 846 Gusztak R.W. and K.L. Campbell. 2004. Growth, development and maintenance of American  
847 water shrews (*Sorex palustris*) in captivity. *Mammal Study* 29:65-72.
- 848 Gusztak R.W., R.A. MacArthur, and K.L. Campbell. 2005. Bioenergetics and thermal  
849 physiology of American water shrews (*Sorex palustris*). *J Comp Physiol B* 175:87–95.
- 850 Halsey L.G., P.J. Butler, and T.M. Blackburn. 2006. A phylogenetic analysis of the allometry of  
851 diving. *Am Nat* 167:276–287.
- 852 Hamilton W.J. 1930. The food of the Soricidae. *J Mammal* 11:26–39.
- 853 Harrington L.A. G.C. Hays, L. Fasola, A.L. Harrington, D. Righton, and D.W. Macdonald. 2012.  
854 Dive performance in a small-bodied, semi-aquatic mammal in the wild. *J Mammal* 93:198–  
855 210.
- 856 He K., T.G. Eastman, H. Czolacz, S. Li, A. Shinohara, S.-I. Kawada, M.S. Springer, M.  
857 Berenbrink, and K.L. Campbell. 2021. Myoglobin primary structure reveals multiple  
858 convergent transitions to semi-aquatic life in the world's smallest mammalian divers. *eLife*  
859 10:e66797.
- 860 Hindle A.G., R.W. Senkiw, and R.A. MacArthur. 2006. Body cooling and the diving capabilities  
861 of muskrats (*Ondatra zibethicus*): A test of the adaptive hypothermia hypothesis. *Comp*  
862 *Biochem Physiol A* 144:232–241.
- 863 Hindle A.G, J.M. Lawler, K.L. Campbell, and M. Horning. 2009. Muscle senescence in short-  
864 lived wild mammals, the soricine shrews *Blarina brevicauda* and *Sorex palustris*. *J Exp Zool*  
865 *A Ecol Genet Physiol* 311A:358–367.
- 866 Hochachka P.W. and T.P. Mommsen. 1983. Protons and anaerobiosis. *Science* 4591:1391–1397.
- 867 Jordaan R.K., M.J. Somers, and T. McIntyre. 2021. The diving behavior of African clawless and  
868 spotted-necked otters in freshwater environments. *J Mammal* gyab031.

- 869 Jürgens K.D. 2002. Etruscan shrew muscle: the consequences of being small. *J Exp Biol*  
870 205:2161–2166.
- 871 Kleiber M. 1975. *The Fire of Life: An Introduction to Animal Energetics*. Huntington, NY: R.E.  
872 Krieger.
- 873 Köhler D. 1991. Notes on the diving behaviour of the water shrew, *Neomys fodiens* (Mammalia,  
874 Soricidae). *Zool Anz* 227:218–228.
- 875 Kooyman G.L., E.A. Wahrenbrock, M.A. Castellini, R.W. Davis, and E.E. Sinnett. 1980.  
876 Aerobic and anaerobic metabolism during voluntary diving in Weddell seals: evidence of  
877 preferred pathways from blood chemistry and behavior. *J Comp Physiol* 138:335–346.
- 878 Kooyman G.L., M.A. Castellini, R.W. Davis, and R.A. Maue. 1983. Aerobic dive limits in  
879 immature Weddell seals. *J Comp Physiol A* 151:171–174.
- 880 Kooyman G.L. and P.J. Ponganis. 1998. The physiological basis of diving to depth: birds and  
881 mammals. *Annu Rev Physiol* 60:19–32.
- 882 Kruuk H., P.T. Taylor, and G.A.T. Mom. 1997. Body temperature and foraging behaviour of the  
883 Eurasian otter (*Lutra lutra*), in relation to water temperature. *J Zool Lond* 241:689–697.
- 884 Levy A. 1964. The accuracy of the bubble meter method for gas flow measurements. *Sci*  
885 *Instrument* 41:449–453.
- 886 Lenfant C., R. Elsner, G.L. Kooyman, and C.M. Drabek. 1970. Gas transport and oxygen storage  
887 capacity in some pinnipeds and the sea otter. *Respir Physiol* 9:277–286.
- 888 MacArthur R.A. 1979. Seasonal patterns of body temperature and activity in free-ranging  
889 muskrats (*Ondatra zibethicus*). *Can J Zool* 57:25–33.
- 890 MacArthur R.A. 1984a. Aquatic thermoregulation in the muskrat (*Ondatra zibethicus*): energy  
891 demands of swimming and diving. *Can J Zool* 62:241–248.

- 892 MacArthur R.A. 1984b. Seasonal changes in hematological and respiratory properties of muskrat  
893 (*Ondatra zibethicus*) blood. *Can J Zool* 62:241–248.
- 894 MacArthur R.A. 1989. Aquatic mammals in cold. In *Advances in Comparative and*  
895 *Environmental Physiology*, vol. 4, *Animal Adaptations to Cold* (ed. L.C.H. Wang) pp. 289–  
896 325. New York: Springer-Verlag.
- 897 MacArthur R.A. and R.E. Krause. 1989. Energy requirements of freely diving muskrats  
898 (*Ondatra zibethicus*). *Can J Zool* 67:2194–2200.
- 899 MacArthur R.A. 1992. Gas bubble release by muskrats diving under ice lost gas or a potential  
900 oxygen pool. *J Zool Lond* 226:151–164.
- 901 MacArthur R.A., M.M. Humphries, G.A. Fines, and K.L. Campbell. 2001. Body oxygen stores,  
902 aerobic dive limits, and the diving abilities of adult and juvenile muskrats (*Ondatra*  
903 *zibethicus*). *Physiol Biochem Zool* 74:178–190.
- 904 McIntyre I.W. 2000. Diving energetics and temperature regulation of the star-nosed mole  
905 (*Condylura cristata*) with comparisons to non-aquatic talpids and the water shrew (*Sorex*  
906 *palustris*). MSc Thesis, University of Manitoba, Winnipeg.
- 907 McIntyre I.W., K.L. Campbell, and R.A. MacArthur. 2002. Body oxygen stores, aerobic dive  
908 limits and diving behaviour of the star-nosed mole (*Condylura cristata*) and comparisons  
909 with non-aquatic talpids. *J Exp Biol* 205:45–54.
- 910 McKean T. and C. Carlton. 1977. Oxygen storage in beavers. *J Appl Physiol* 42:545–547.
- 911 Murrish D.E. 1970. Responses to diving in the dipper, *Cinclus mexicanus*. *Comp Biochem*  
912 *Physiol* 34:853–858.



- 913 Mirceta S., A.V. Signore, J.M. Burns, A.R. Cossins, K.L. Campbell, and M. Berenbrink. 2013.  
914 Evolution of mammalian diving capacity traced by myoglobin net surface charge. *Science*  
915 340:1234192.
- 916 Nakagawa Y. and M. Hattori. 2002. Relationship between muscle buffering capacity and fiber  
917 type during anaerobic exercise in human. *J Physiol Anthropol* 21:129–131.
- 918 Niizuma Y., G.W. Gabrielsen, K. Sato, Y. Watanuki, and Y. Naito. 2007) Brünnich’s guillemots  
919 (*Uria lomvia*) maintain high temperature in the body core during dives. *Comp Biochem*  
920 *Physiol A* 147:438–444.
- 921 Ordway G.A. and D.J. Garry. 2004. Myoglobin: an essential hemoprotein in striated muscle. *J*  
922 *Exp Biol* 207:3441–3446.
- 923 Ponganis P.J., L.N. Starke, M. Horning, and G.L. Kooyman. 1999. Development of diving  
924 capacity in emperor penguins. *J Exp Biol* 202:781–786.
- 925 Ponganis P.J., R.P. Van Dam, D.H. Levenson, R. Knowler, K.V. Ponganis, and G. Marshall.  
926 2003. Regional heterothermy and conservation of core temperature in emperor penguins  
927 diving under sea ice. *Comp Biochem Physiol A* 135:477–487.
- 928 Prothero J.W. 1980. Scaling of blood parameters in mammals. *Comp Biochem Physiol A*  
929 67:649–657.
- 930 Quick N.J., W.R. Cioffi, J.M. Shearer, A. Fahlman, and A.J. Read. 2020. Extreme diving in  
931 mammals: first estimates of behavioural aerobic dive limits in Cuvier’s beaked whales. *J Exp*  
932 *Biol* 223: jeb222109.
- 933 Reynafarje B. 1963. Simplified method for the determination of myoglobin. *J Lab Clin Med*  
934 61:138–145.

- 935 Ruthardt M. and R. Schröpfer. 1985. Zum Verhalten der wasserspitzmaus *Neomys fodiens*  
936 (Penant, 1771) unter wasser. *Z Angew Zool* 72:49–57.
- 937 Samuel P.P., L.P. Smith, G.N. Phillips Jr., and J.S. Olson. 2015. Apoglobin stability is the major  
938 factor governing both cell-free and in vivo expression of holomyoglobin. *J Biol Chem*  
939 290:23479–23495.
- 940 Scholetch R. 1980. Freilandbeobachtungen an der wasserspitzmaus, *Neomys fodiens* (Pennant,  
941 1771) im Schweizerischen Nationalpark. *Revue Suisse Zool* 87:937–939.
- 942 Schreer J.F. and K.M. Kovacs. 1997. Allometry of diving capacity in air-breathing vertebrates.  
943 *Can J Zool* 75:339–358.
- 944 Sorenson M.W. 1962. Some aspects of water shrew behavior. *Am Midl Nat* 68:445–462.
- 945 Stewart J.M., A.K. Woods, and J.A. Blakely. 2005. Maximal enzyme activities, and myoglobin  
946 and glutathione concentrations in heart, liver and skeletal muscle of the Northern short-tailed  
947 shrew (*Blarina brevicauda*; Insectivora: Soricidae). *Comp Biochem Physiol B* 141:267–273.
- 948 Stahl W.R. 1967. Scaling of respiratory variables in mammals. *J Appl Physiol* 22:453–460.
- 949 Vogel P. 1990. Body temperature and fur quality in swimming water-shrews, *Neomys fodiens*  
950 (Mammalia, Insectivora). *Z Saeugetierkd* 55:73–80.
- 951 Vogel P. 1998. Diving capacity and foraging behaviour of the water shrew (*Neomys fodiens*).  
952 *Symp Zool Soc Lond* 71:31–47.
- 953 Vornanen M.A. 1992. Maximum heart rate of soricine shrews: correlation with contractile  
954 properties and myosin composition. *Am J Physiol Reg Integr Comp Physiol* 262:R842–R851.
- 955 Weibel E.R. 1970/71. Morphometric estimation of pulmonary diffusing capacity. I. Model and  
956 method. *Resp Physiol* 11:54–75.

- 957 Weibel E.R. 1985. Design and performance of muscular systems: an overview. *J Exp Biol*  
958 115:405–412.
- 959 White C.R. and R.S. Seymour. 2003. Mammalian basal metabolic rate is proportional to body  
960 mass<sup>2/3</sup>. *Proc Natl Acad Sci* 100:4046–4049.
- 961 Whittaker J.C., G. Hammerson, and S.J. Norris. 2008. *Sorex palustris*. In: IUCN 2009. IUCN  
962 Red list of threatened species. Version 2009.2. [www.iucnredlist.org](http://www.iucnredlist.org).
- 963 Wolk E. 1974. Variations in hematological parameters of shrews. *Acta Theriol* 19:315–346.
- 964 Yeates L.C., T.M. Williams, and T.L. Fink. 2007. Diving and foraging energetics of the smallest  
965 marine mammal, the sea otter (*Enhydra lutris*). *J Exp Biol* 210:1960–1970.
- 966 Zar J.H. 1974. *Biostatistical analysis*. Prentice-Hall. Englewood Cliff, NJ.

Table 1. The effect of water temperature on the voluntary dive behavior of 18 captive American water shrews (*Sorex palustris*).

| Variable                                    | Water temperature (°C) |                          |                         |                        |
|---------------------------------------------|------------------------|--------------------------|-------------------------|------------------------|
|                                             | 3                      | 10                       | 20                      | 30                     |
| Total time in water (sec)                   | 111±14 <sup>a</sup>    | 134±15 <sup>a</sup>      | 184±21 <sup>a,b</sup>   | 235±25 <sup>b</sup>    |
| All dives ( <i>n</i> )                      | 257                    | 258                      | 279                     | 303                    |
| Dive duration (sec)                         | 4.±0.2 <sup>a</sup>    | 4.9±0.2 <sup>b</sup>     | 5.2±0.2 <sup>b</sup>    | 5.5±0.2 <sup>b</sup>   |
| Dive frequency (dives • min <sup>-1</sup> ) | 0.71±0.08 <sup>a</sup> | 0.71±0.09 <sup>a</sup>   | 0.77±0.07 <sup>a</sup>  | 0.84±0.11 <sup>a</sup> |
| Dive:surface ratio                          | 0.12±0.02 <sup>a</sup> | 0.20±0.02 <sup>a,b</sup> | 0.25±0.09 <sup>b</sup>  | 0.27±0.03 <sup>b</sup> |
| Duration of five longest dives (sec)        | 6.4±0.5 <sup>a</sup>   | 7.6±0.5 <sup>a,b</sup>   | 8.5±0.5 <sup>b,c</sup>  | 9.3±0.6 <sup>c</sup>   |
| Duration of longest dive (sec)              | 8.1±0.7 <sup>a</sup>   | 9.7±0.6 <sup>a,b</sup>   | 11.3±0.8 <sup>b,c</sup> | 12.4±0.9 <sup>c</sup>  |

Values presented are means ± 1 SE.

Within each row, means sharing the same letter are not statistically different ( $P>0.05$ ).

Table 2. Telemetered body temperatures ( $T_b$ ) recorded from six American water shrews during 20-min voluntary dive trials in 3–30°C water.

| Variable                                                            | Water temperature (°C)    |                         |                           |                           |
|---------------------------------------------------------------------|---------------------------|-------------------------|---------------------------|---------------------------|
|                                                                     | 3                         | 10                      | 20                        | 30                        |
| Time in water (sec)                                                 | 106.9±22.4 <sup>a</sup>   | 152.5±34.0 <sup>a</sup> | 180.4±29.4 <sup>a</sup>   | 162.1±18.7 <sup>a</sup>   |
| Rate of cooling during first 5 min of trial (°C min <sup>-1</sup> ) | 1.61±0.63 <sup>a</sup>    | 0.92±0.24 <sup>a</sup>  | 0.99±0.31 <sup>a</sup>    | 0.43±0.15 <sup>a</sup>    |
| $T_b$ measurements (°C)                                             |                           |                         |                           |                           |
| Pre-trial $T_b$                                                     | 40.0±0.2 <sup>a,1</sup>   | 40.1±0.1 <sup>a,1</sup> | 39.9±0.1 <sup>a,1</sup>   | 40.1±0.2 <sup>a,1</sup>   |
| Mean $T_b$ during diving                                            | 38.9±0.3 <sup>a,2,3</sup> | 39.1±0.2 <sup>a,2</sup> | 38.7±0.4 <sup>a,2,3</sup> | 39.4±0.2 <sup>a,2</sup>   |
| Lowest $T_b$ in trial                                               | 38.0±0.3 <sup>a,3</sup>   | 38.4±0.2 <sup>a,3</sup> | 37.7±0.5 <sup>a,3</sup>   | 38.8±0.2 <sup>a,3</sup>   |
| Highest post-trial $T_b$                                            | 39.5±0.2 <sup>a,1,2</sup> | 39.8±0.2 <sup>a,1</sup> | 39.8±0.2 <sup>a,1,2</sup> | 39.5±0.1 <sup>a,1,2</sup> |

Values presented are means ± 1 SE.

Values within a row sharing the same letter do not differ significantly ( $P>0.05$ ).

Values within a column sharing the same number do not differ significantly ( $P>0.05$ ).

Table 3. Respiratory characteristics of short-tailed and American water shrews. Values are presented as means  $\pm$  1 SE, with number of animals sampled indicated in parentheses.

| Variable                                                 | American water shrew  |                                    | Short-tailed shrew                 |                      |
|----------------------------------------------------------|-----------------------|------------------------------------|------------------------------------|----------------------|
|                                                          | Juvenile              | Adult                              | Adult                              | Juvenile             |
| Body mass (g)                                            | 13.00 $\pm$ 0.45 (20) | 14.57 $\pm$ 0.36 (21) <sup>a</sup> | 24.26 $\pm$ 1.41 (10) <sup>b</sup> | 21.78 $\pm$ 0.13 (7) |
| % total body muscle mass                                 | 36.72 $\pm$ 2.34 (2)  | 40.51 $\pm$ 3.38 (9)               | 24.13 $\pm$ 1.80 (2) <sup>b</sup>  | No data              |
| Myoglobin concentration (mg g wet tissue <sup>-1</sup> ) |                       |                                    |                                    |                      |
| Forelimb                                                 | 3.75 $\pm$ 0.22 (10)  | 6.18 $\pm$ 0.31 (10) <sup>a</sup>  | 2.98 $\pm$ 0.32 (7) <sup>b</sup>   | No data              |
| Hindlimb                                                 | 3.76 $\pm$ 0.16 (10)  | 5.89 $\pm$ 0.45 (9) <sup>a</sup>   | 3.01 $\pm$ 0.40 (6) <sup>b</sup>   | No data              |
| Mean skeletal muscle concentration <sup>z</sup>          | 3.76 $\pm$ 0.12 (10)  | 6.04 $\pm$ 0.25 (9) <sup>a</sup>   | 3.03 $\pm$ 0.26 (9) <sup>b</sup>   | 2.70 $\pm$ 0.49 (7)  |
| Heart                                                    | 10.97 $\pm$ 1.22 (5)  | 9.47 $\pm$ 0.63 (6)                | 8.77 $\pm$ 0.55 (5)                | 8.77 $\pm$ 0.79 (5)  |
| Buffering capacity, $\beta$ (slyke) <sup>c</sup>         | 30.67 $\pm$ 2.34 (11) | 38.22 $\pm$ 2.28 (13) <sup>a</sup> | 24.88 $\pm$ 1.40 (10) <sup>b</sup> | 25.05 $\pm$ 1.92 (6) |
| Total lung volume (mL STPD 100 g <sup>-1</sup> )         | 4.55 $\pm$ 0.18 (9)   | 4.57 $\pm$ 0.28 (5)                | 3.34 $\pm$ 0.07 (6) <sup>b</sup>   | 3.43 $\pm$ 0.11 (5)  |
| Hematocrit (%)                                           | 50.57 $\pm$ 1.33 (10) | 50.23 $\pm$ 1.33 (15)              | 48.78 $\pm$ 2.50 (8)               | 50.17 $\pm$ 2.50 (7) |
| Hemoglobin content (g 100 mL <sup>-1</sup> )             | 19.69 $\pm$ 1.02 (8)  | 20.09 $\pm$ 0.44 (13)              | 17.29 $\pm$ 0.62 (7) <sup>b</sup>  | 16.87 $\pm$ 1.54 (6) |
| Blood O <sub>2</sub> capacity (vol. %)                   | 26.38 $\pm$ 1.37 (8)  | 26.93 $\pm$ 0.58 (13)              | 23.18 $\pm$ 0.84 (7) <sup>b</sup>  | 22.61 $\pm$ 0.14 (6) |

<sup>a</sup>Values for adult and juvenile water shrews are significantly different (P<0.05).

<sup>b</sup>Values for adult water shrews and adult short-tailed shrews are significantly different (P<0.05).

<sup>c</sup>Slyke =  $\mu$ moles of base required to titrate the pH of 1 g of wet muscle by 1 pH unit.

Table 4. Oxygen storage capacities of the lungs, blood, and skeletal muscle of adult and juvenile American water shrews (*Sorex palustris*) and adult short-tailed shrews (*Blarina brevicauda*).

| Species                      | N | Oxygen stores (mL O <sub>2</sub> STPD kg <sup>-1</sup> ) |                |              |           |            | Calculated ADL (sec) <sup>a</sup> |      |
|------------------------------|---|----------------------------------------------------------|----------------|--------------|-----------|------------|-----------------------------------|------|
|                              |   | Lung                                                     | Arterial blood | Venous blood | Muscle    | Total      | Water temperature (°C)<br>10      | 30   |
| Adult <i>S. palustris</i>    | 8 | 6.60±0.08                                                | 6.33±0.04      | 10.12±0.07   | 3.26±0.21 | 26.31±0.24 | 10.8                              | 14.4 |
| Juvenile <i>S. palustris</i> | 4 | 6.29±0.22                                                | 6.15±0.06      | 9.77±0.11    | 1.84±0.09 | 24.06±0.16 | 9.9                               | 13.2 |
| Adult <i>B. brevicauda</i>   | 2 | 5.01                                                     | 5.45±0.37      | 8.37±0.75    | 1.32±0.04 | 20.14±1.07 | N/A                               | N/A  |

<sup>a</sup>The aerobic dive limit (ADL) was calculated for a 14.0 g water shrew assuming a diving metabolic rate of 8.77 mL O<sub>2</sub> g<sup>-1</sup> hr<sup>-1</sup> in 10°C water and 6.57 mL O<sub>2</sub> g<sup>-1</sup> hr<sup>-1</sup> in 30°C water (see text for details).

Supplemental Table 1. Contingency table using the method of log-likelihood ratio to compare the frequency distribution of voluntary dives by adult American water shrews with ( $N=6$ ) and without ( $N=6$ ) an implanted abdominal temperature transmitter.

| Variable                                                      | Dive duration (sec) |     |     |      |       |     | Total |
|---------------------------------------------------------------|---------------------|-----|-----|------|-------|-----|-------|
|                                                               | 0-2                 | 3-5 | 6-8 | 9-11 | 12-14 | >15 |       |
| Number of dives completed by water shrews without transmitter | 109                 | 96  | 69  | 29   | 13    | 3   | 319   |
| Number of dives completed by water shrews with transmitter    | 92                  | 104 | 75  | 36   | 10    | 3   | 320   |
| Total                                                         | 201                 | 200 | 144 | 65   | 23    | 6   | 639   |

df=5, critical value=11.07.

Calculated G-value=2.78,  $P>0.50$ .



Supplemental Table 2. Comparison of the dive performance of adult American water shrews with and without a surgically implanted abdominal temperature transmitter. Dive data for each animal are pooled values from 20-min dive trials completed in 3, 10, 20, and 30°C water.

|                              | Mass (g)<br>(without<br>transmitter) | Mean dive<br>duration<br>(sec) | Mean dive<br>frequency<br>(dives min <sup>-1</sup> ) | Mean deep<br>dive<br>duration<br>(sec) | Mean deep<br>dive<br>frequency<br>(dives min <sup>-1</sup> ) | Longest dive<br>(sec) | Dive:surface<br>ratio | Total time<br>in water per<br>trial (sec) |
|------------------------------|--------------------------------------|--------------------------------|------------------------------------------------------|----------------------------------------|--------------------------------------------------------------|-----------------------|-----------------------|-------------------------------------------|
| Non-implanted                |                                      |                                |                                                      |                                        |                                                              |                       |                       |                                           |
| Shrew 1                      | 16.3                                 | 5.1                            | 0.39                                                 | 8.8                                    | 0.05                                                         | 12.2                  | 0.21                  | 132.0                                     |
| Shrew 2                      | 13.6                                 | 5.8                            | 0.48                                                 | 13.9                                   | 0.04                                                         | 23.7                  | 0.21                  | 160.0                                     |
| Shrew 5                      | 14.0                                 | 6.4                            | 0.85                                                 | 8.5                                    | 0.41                                                         | 13.2                  | 0.26                  | 170.5                                     |
| Shrew 8                      | 17.8                                 | 4.2                            | 0.76                                                 | 7.8                                    | 0.08                                                         | 13.9                  | 0.13                  | 193.0                                     |
| Shrew 9 <sup>a</sup>         | 13.3                                 | 5.3                            | 0.94                                                 | 8.5                                    | 0.20                                                         | 11.7                  | No data               | 163.9                                     |
| Shrew 10                     | 15.6                                 | 4.1                            | 0.53                                                 | 7.4                                    | 0.10                                                         | 12.6                  | 0.31                  | 83.9                                      |
| <b>Mean</b>                  | <b>15.1±0.8</b>                      | <b>5.2±0.4</b>                 | <b>0.66±0.10</b>                                     | <b>9.2±1.1</b>                         | <b>0.15±0.06</b>                                             | <b>14.6±2.0</b>       | <b>0.22±0.03</b>      | <b>150.5±17.0</b>                         |
| Transmitter implanted        |                                      |                                |                                                      |                                        |                                                              |                       |                       |                                           |
| Shrew 12                     | 15.1                                 | 4.3                            | 0.40                                                 | 8.1                                    | 0.14                                                         | 16.7                  | 0.10                  | 108.2                                     |
| Shrew 13                     | 14.1                                 | 5.9                            | 0.85                                                 | 7.8                                    | 0.13                                                         | 14.8                  | 0.11                  | 198.0                                     |
| Shrew 14                     | 15.2                                 | 4.3                            | 0.70                                                 | 5.9                                    | 0.14                                                         | 9.8                   | 0.21                  | 151.0                                     |
| Shrew 15                     | 14.0                                 | 6.3                            | 1.00                                                 | 8.8                                    | 0.29                                                         | 20.1                  | 0.33                  | 185.8                                     |
| Shrew 16                     | 14.0                                 | 4.1                            | 0.44                                                 | 6.1                                    | 0.05                                                         | 10.2                  | 0.19                  | 80.7                                      |
| Shrew 17                     | 14.2                                 | 7.0                            | 0.58                                                 | 9.7                                    | 0.14                                                         | 14.5                  | 0.22                  | 167.8                                     |
| <b>Mean</b>                  | <b>14.4±0.3</b>                      | <b>5.3±0.6</b>                 | <b>0.66±0.11</b>                                     | <b>7.7±0.7</b>                         | <b>0.15±0.03</b>                                             | <b>14.4±1.8</b>       | <b>0.19±0.04</b>      | <b>148.6±20.4</b>                         |
| <i>P</i> -value <sup>b</sup> | 0.199                                | 0.397                          | 0.490                                                | 0.124                                  | 0.487                                                        | 0.468                 | 0.263                 | 0.468                                     |

<sup>a</sup>Dive data taken from McIntyre 2000; note that dive:surface ratio was not reported for this animal.

<sup>b</sup>Calculated using 1-tailed Student's *t*-test.

## Figure Legends

Figure 1. Influence of water temperature on the diving behavior of 18 American water shrews in 30, 20, 10, and 3°C water. Shallow dives (<10 cm deep) are denoted by open bars, while deep dives (60 cm) are denoted by stippled bars. Behavioral (bADL) and calculated aerobic dive limits (cADL) are denoted by dotted and dashed lines, respectively, while solid circles indicate mean dive time at each water temperature.

Figure 2. Telemetered body temperatures ( $T_b$ )  $\pm$  1 SE of six American water shrews voluntarily diving during 20-min trials in 3–30°C water. Pre- and post-trial measurements were taken from shrews in temporary holding containers immediately before and after the trials (see text for details).

Figure 3. The distribution of dive times for three American shrews diving in a semi-natural riparian environment in 3°C water over 12- to 28-hr periods. The calculated behavioral aerobic dive limit (bADL) of 10.7 sec is indicated by the dotted line.

Figure. 4. Mean body temperature  $\pm$  1 SE of five American water shrews in the 35 min prior to initiating foraging bouts in a semi-natural riparian environment.

Figure 5. Representative body temperature (dashed lines) and relative activity traces (grey bars) of two adult American water shrews during 12- to 28-hr trials in a natural riparian environment (water temperature=3°C). Open boxes represent body temperature at the start of each water excursion, while red circles denote body temperature immediately following exit from the water.

Figure 6. The relationship of diving metabolic rate to total submergence time of American water shrews voluntarily diving in 10°C (open circles, dash line) and 30°C (closed squares, solid line). The dotted line denotes the basal metabolic rate (BMR; 4.84 mL O<sub>2</sub> g<sup>-1</sup> hr<sup>-1</sup>) of water shrews (Gusztak et al. 2005).

Figure 7. Pooled behavioral and body temperature (T<sub>b</sub>) data for American water shrews implanted with a 1.0-g intra-abdominal transmitter and voluntarily diving in a) 3°C and 10°C water and b) during the 12- to 28-hr trials in 3°C water. Although the relationship between dive duration and core T<sub>b</sub> is significant in both instances, no significant relationship was observed when the analysis was limited to dives greater than the calculated aerobic dive limit (~10 sec; denoted by filled circles). The frequency distribution of T<sub>b</sub> recordings in c) 3°C and 10°C water and d) during the 12- to 28-hr trials in 3°C water are also presented.

Supplemental Figure 1. Photograph of the semi-natural riparian set up for observing the voluntary aquatic behavior, body temperature, and activity of five adult water shrews over periods ranging from 12 to 28 hr.

Supplemental Figure 2. Percentage of a) total voluntary dives completed and b) corresponding mean dive times of 6 transmitter-implanted American water shrews during successive 5-min periods of each dive trial (*n*=317). Bars sharing the same letters are not significantly different (*P*<0.05).

Supplemental Figure 3. Frequency distribution of voluntary dive times of 25 American water shrews diving in 3–30°C water ( $n=1584$  dives). Shallow dives (<10 cm deep) are denoted by open bars, while deep dives (60 cm) are denoted by stippled bars. The mean dive time of all dives combined was  $5.1\pm 0.1$  sec, while the mean duration of deep dives was  $8.1\pm 0.2$  sec ( $n=311$ ).

Supplemental Figure 4. The relationship of inter-dive surface time to duration of preceding dive in water shrews completing consecutive dives during voluntary dive trials. The regression line was fitted by the method of least squares.

Supplemental Figure 5. Body temperature (dashed lines) and relative activity traces (grey bars) of three adult American water shrews during 12- to 28-hr trials in a natural riparian environment (water temperature=3°C). Open boxes represent body temperature at the start of each water excursion, while red circles denote body temperature immediately following exit from the water.

Figure 1

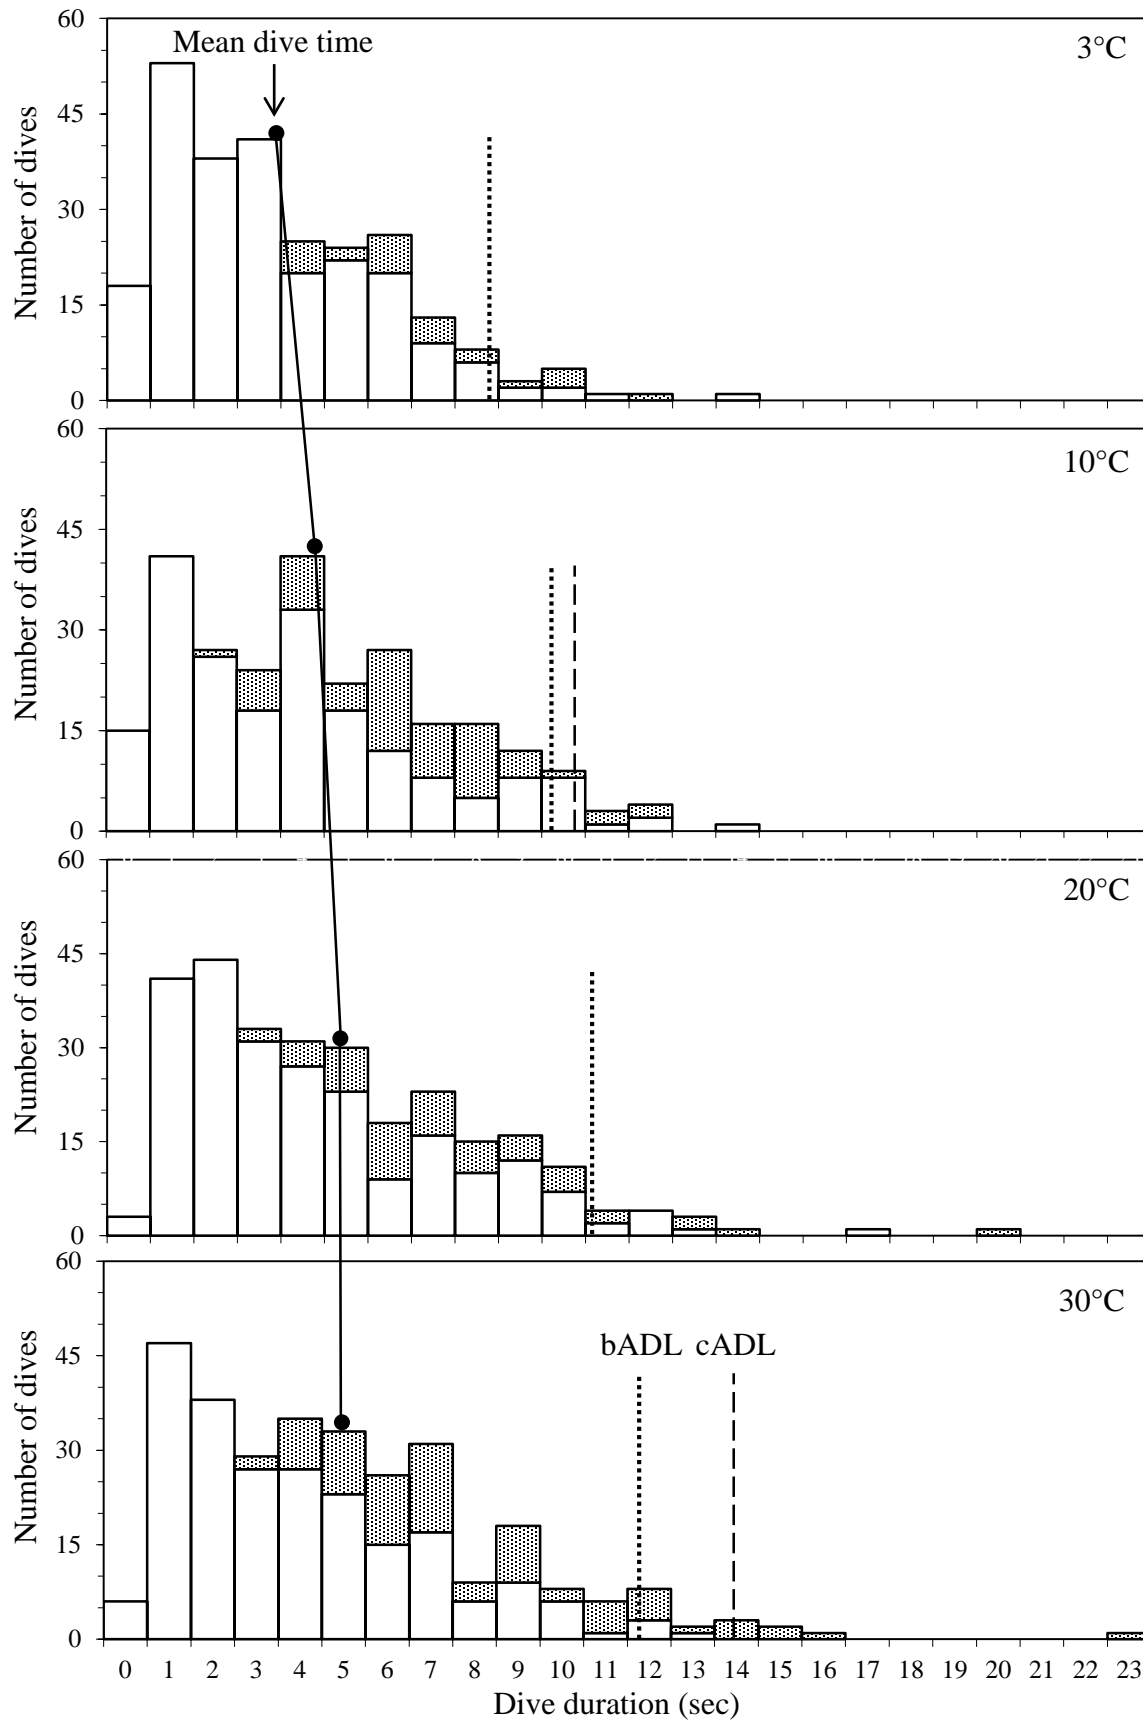

Figure 2

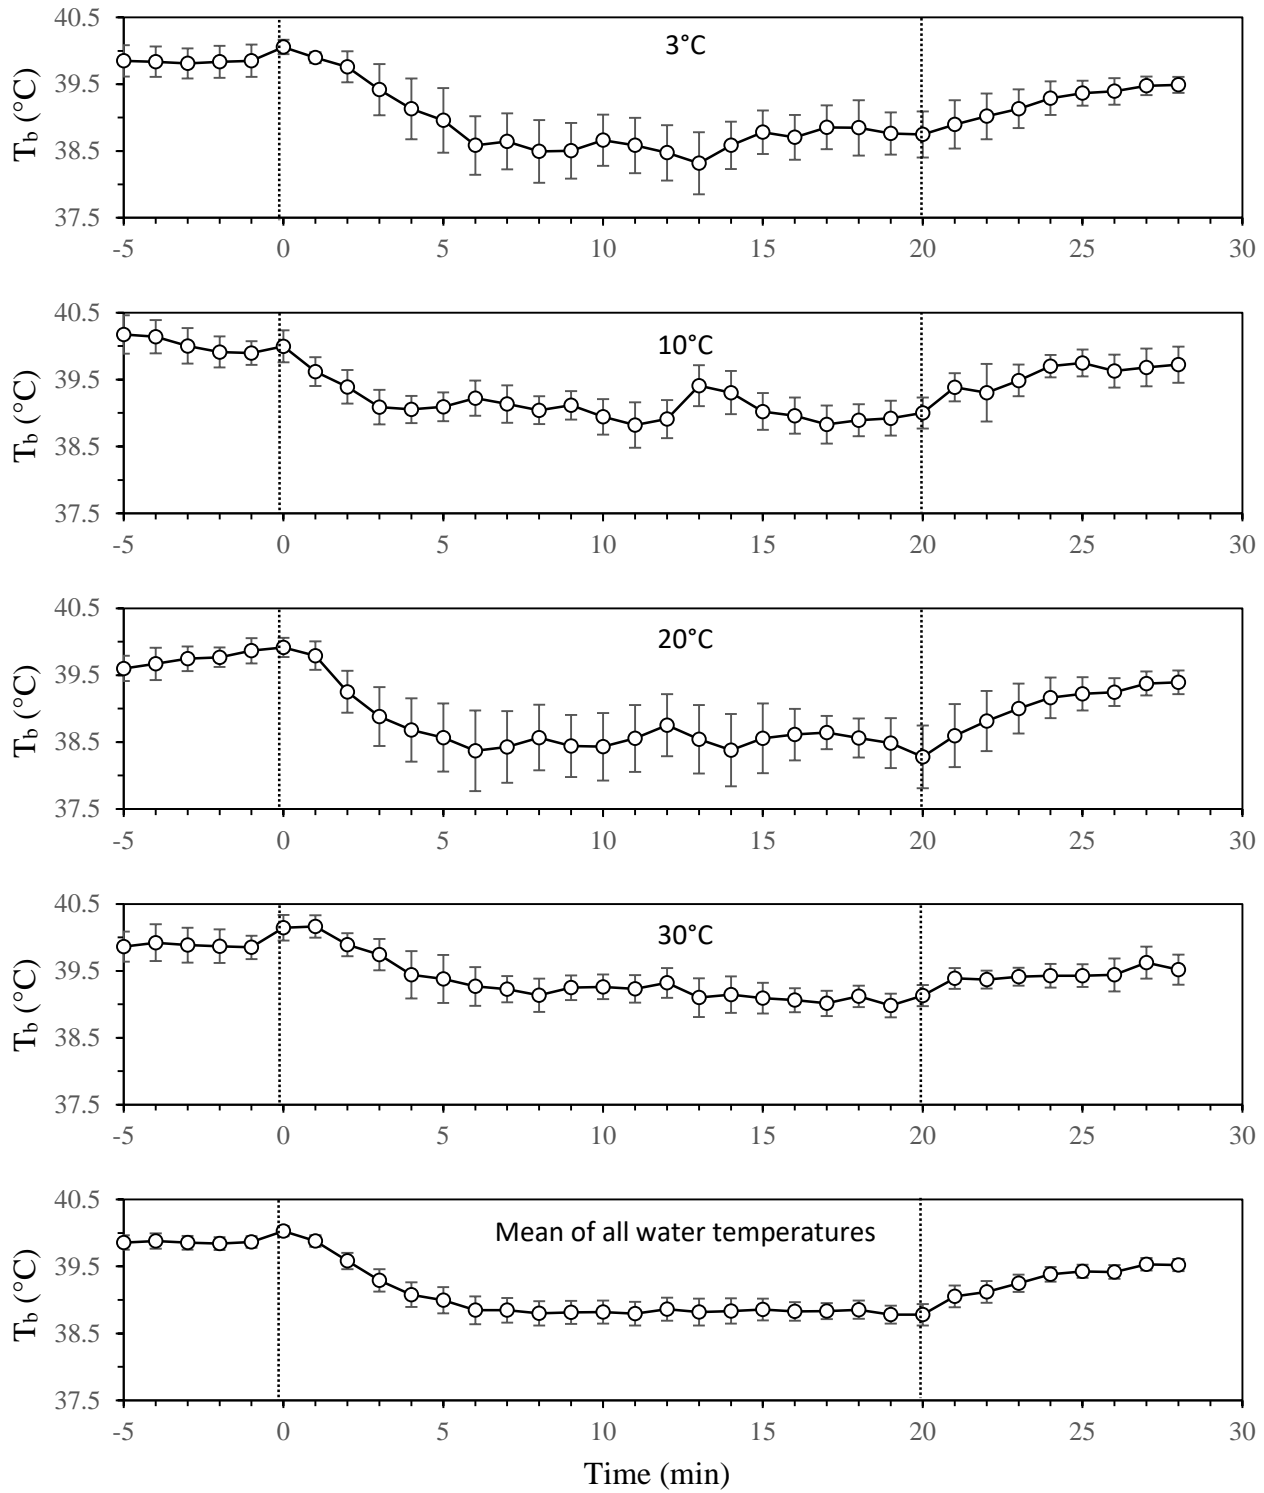

Figure 3

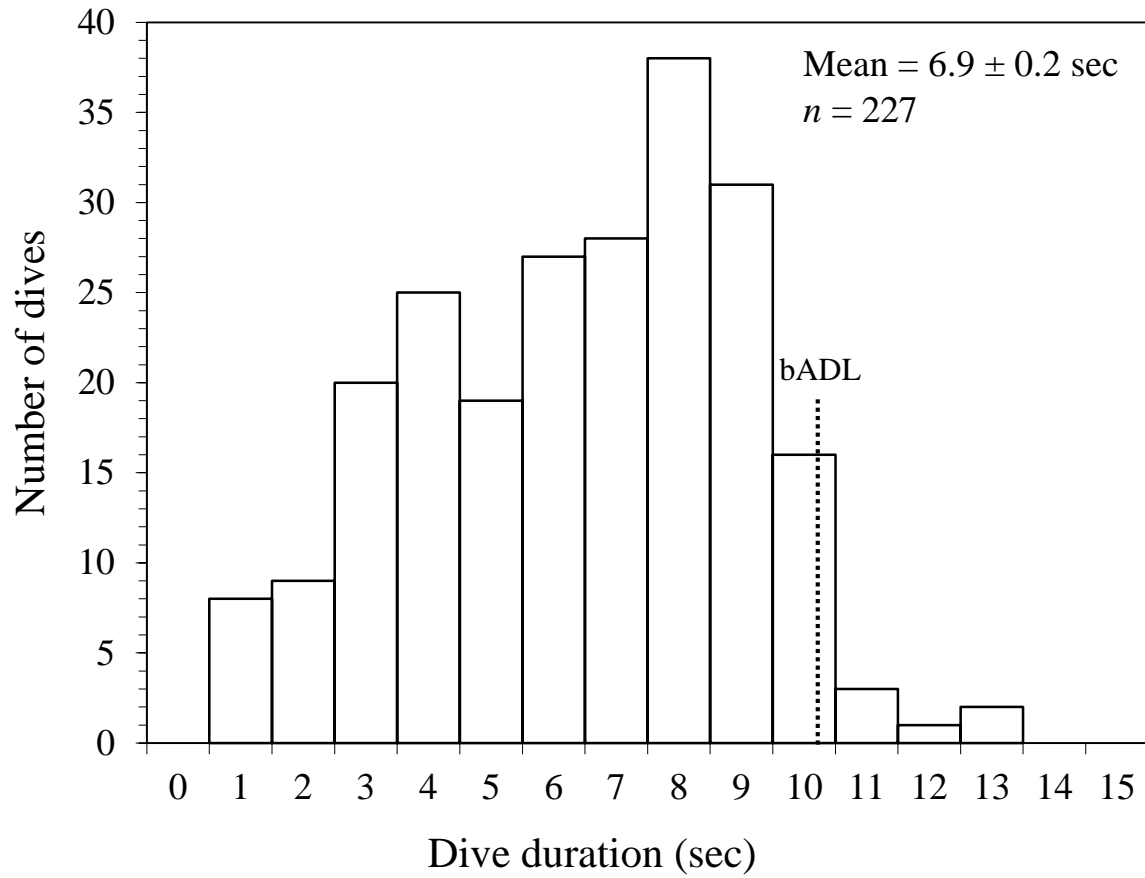

Figure 4

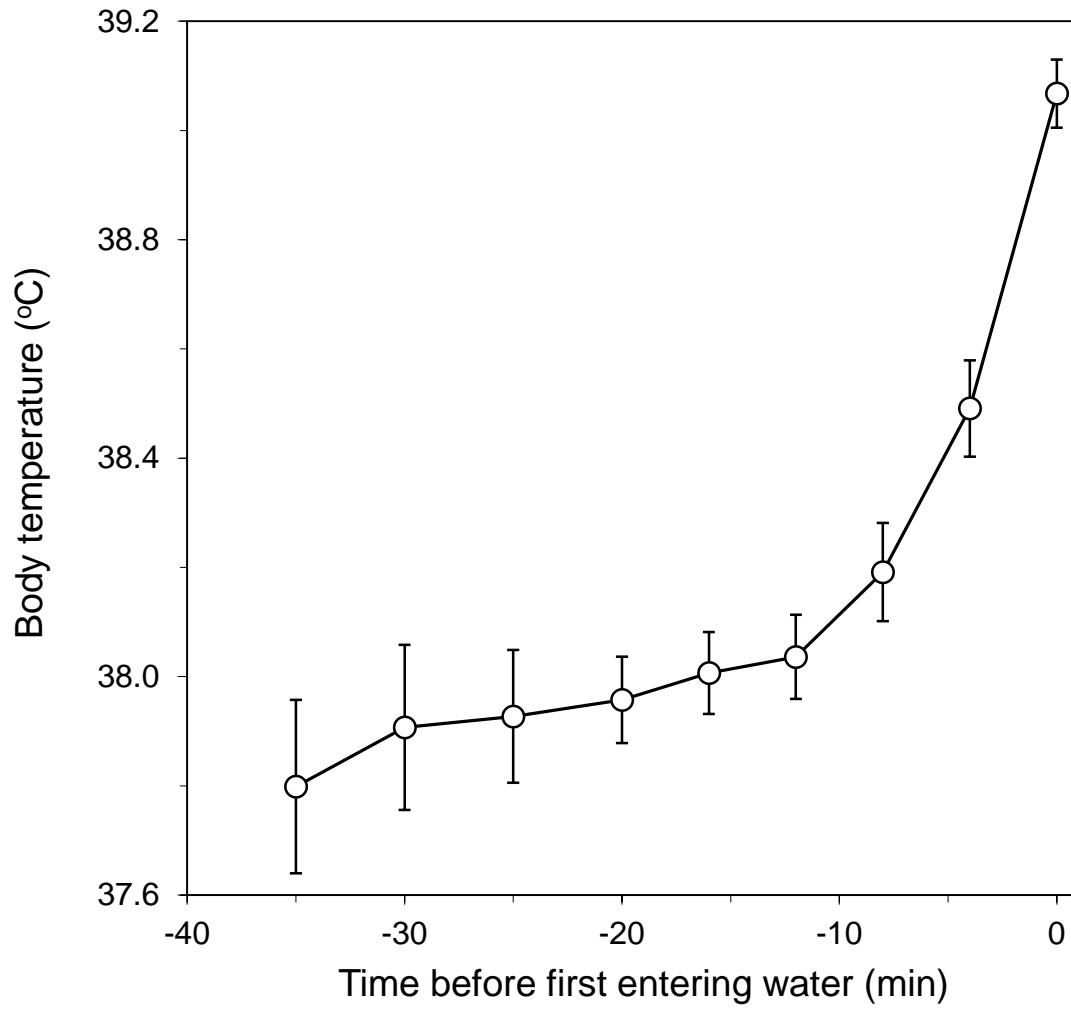



Figure 5

Shrew #13: 24-hr trial (average mass = 14.5 g)

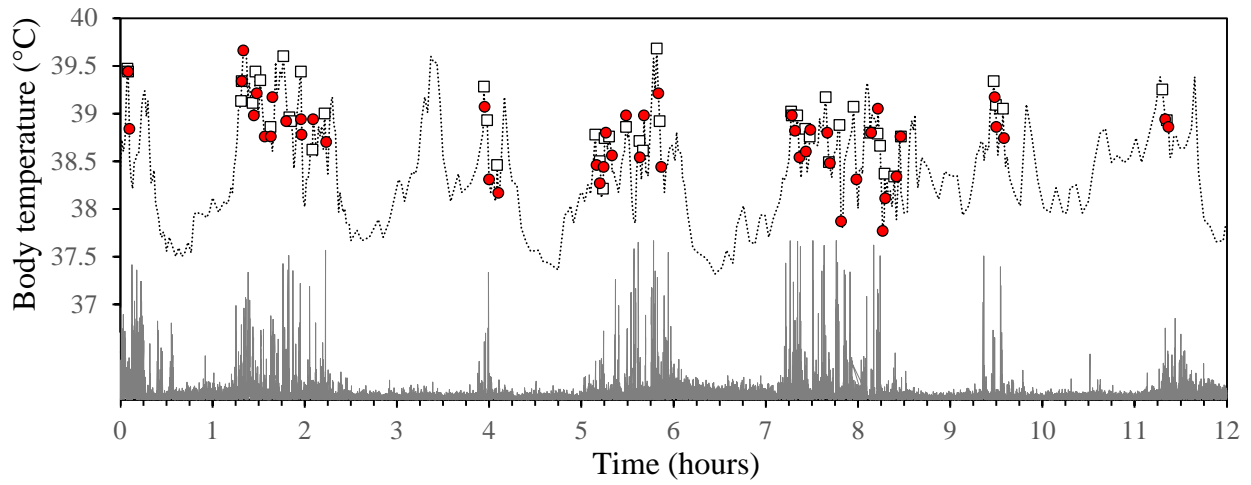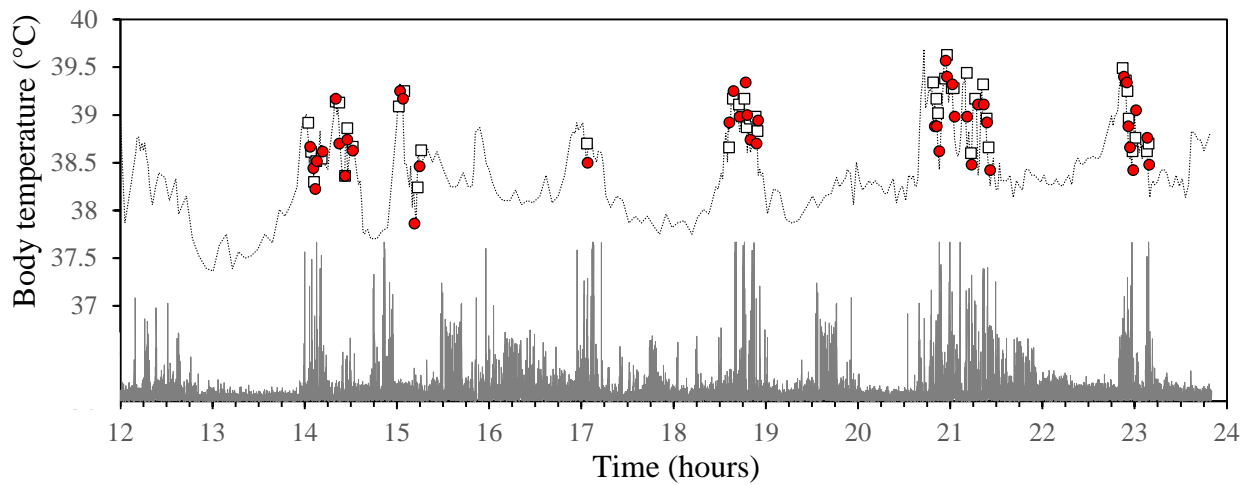

Shrew #17: 12-hr trial (average mass = 13.3 g)

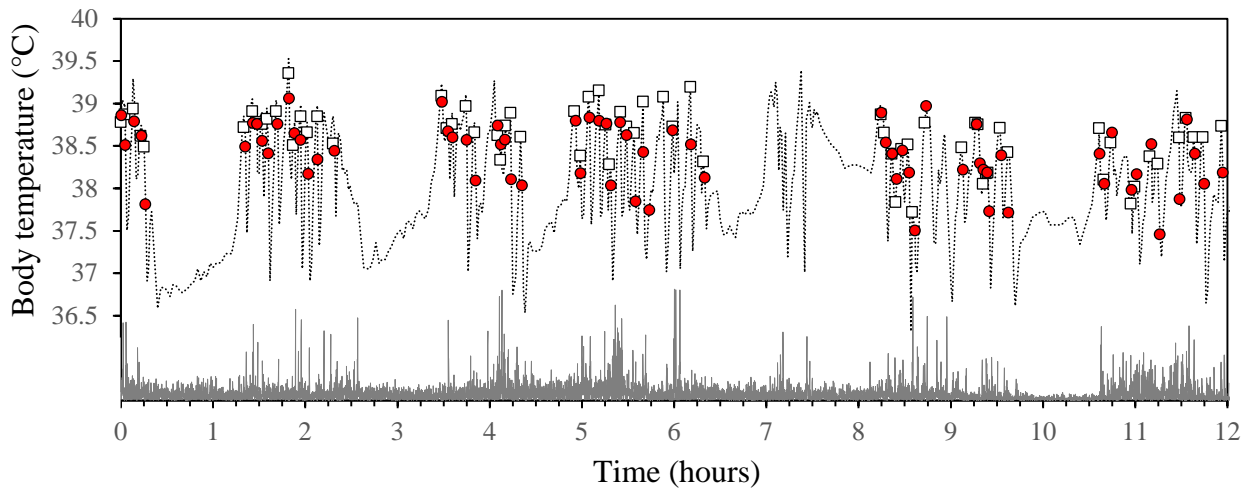

Figure 6

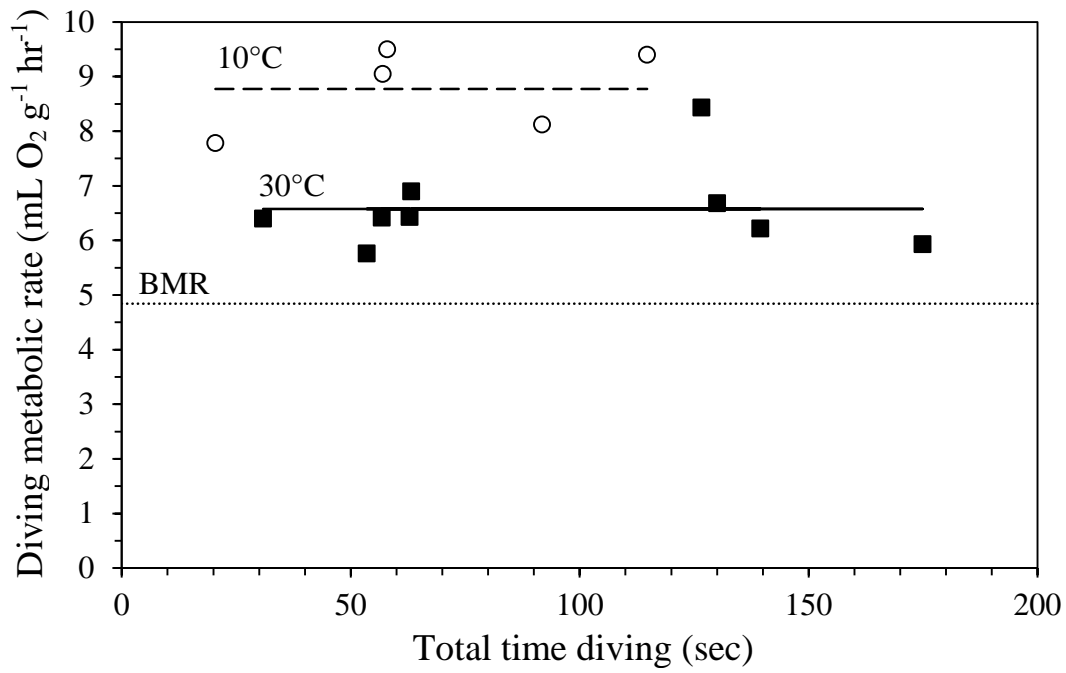

Figure 7

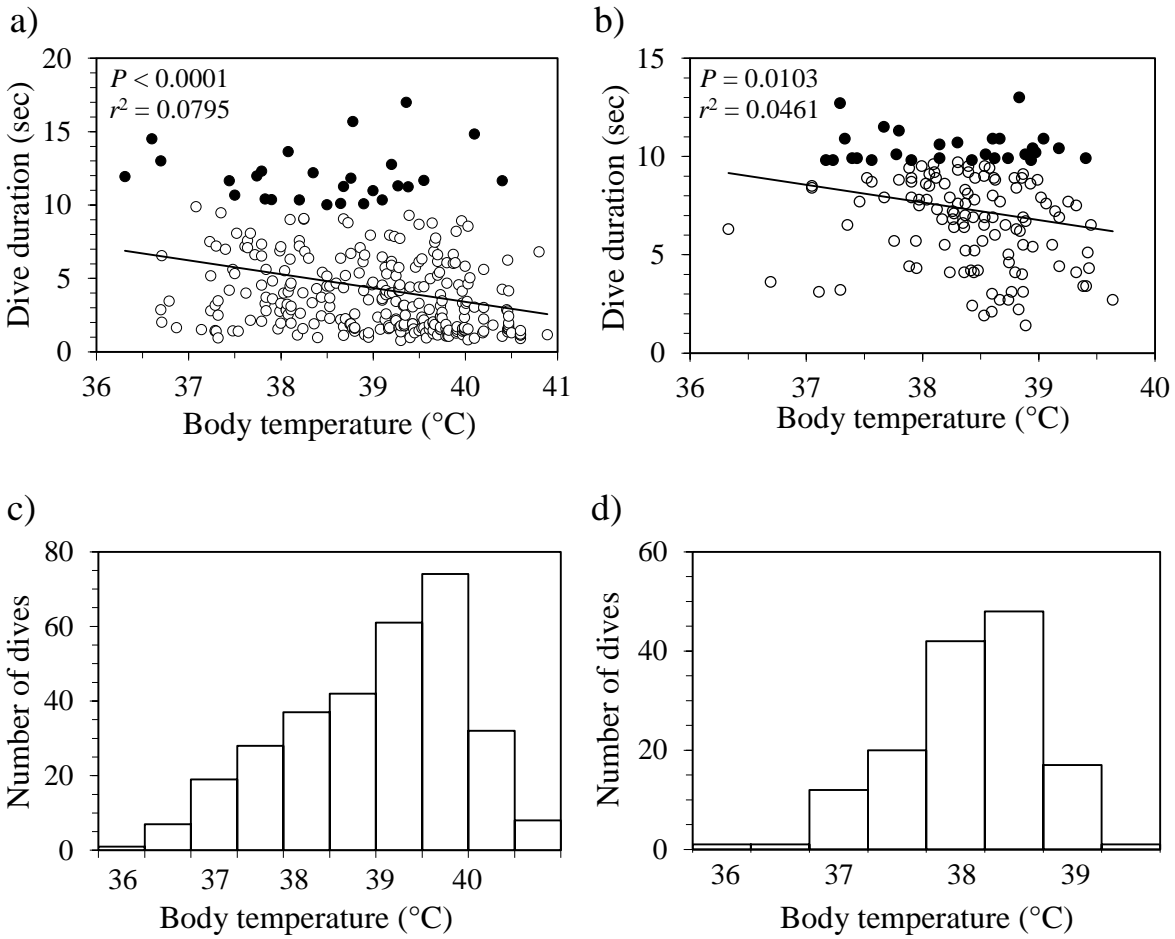

## Supplemental figure 1

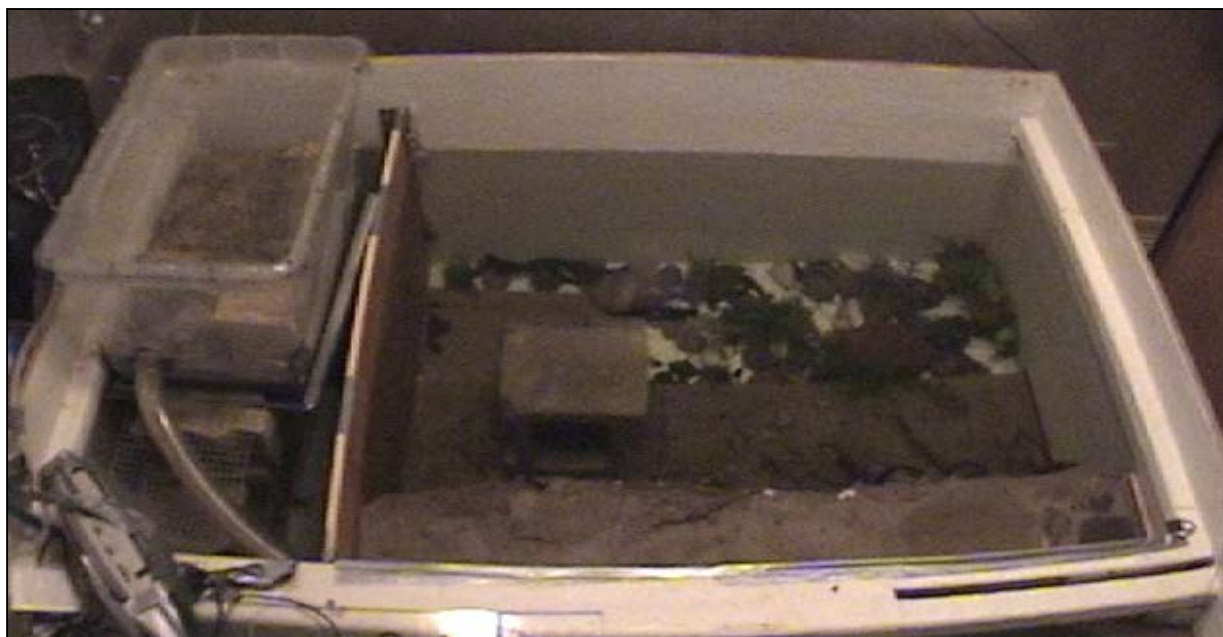

Supplemental Figure 2

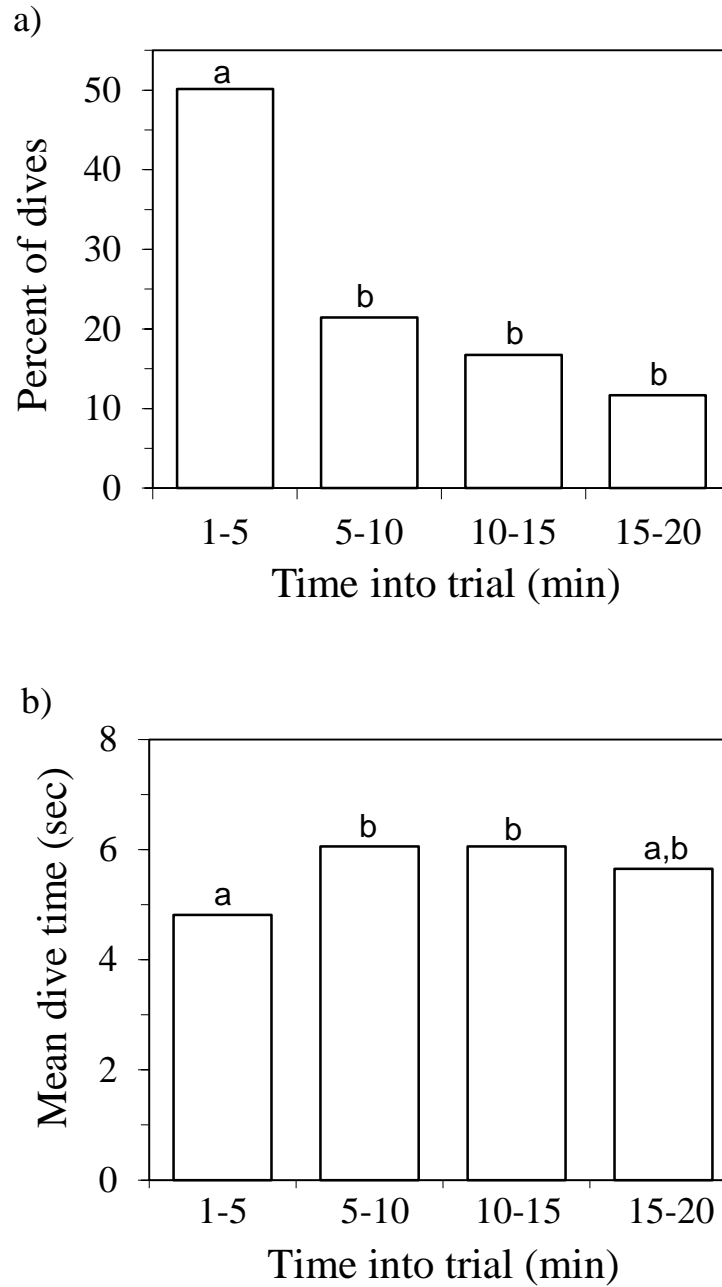

Supplemental Figure 3

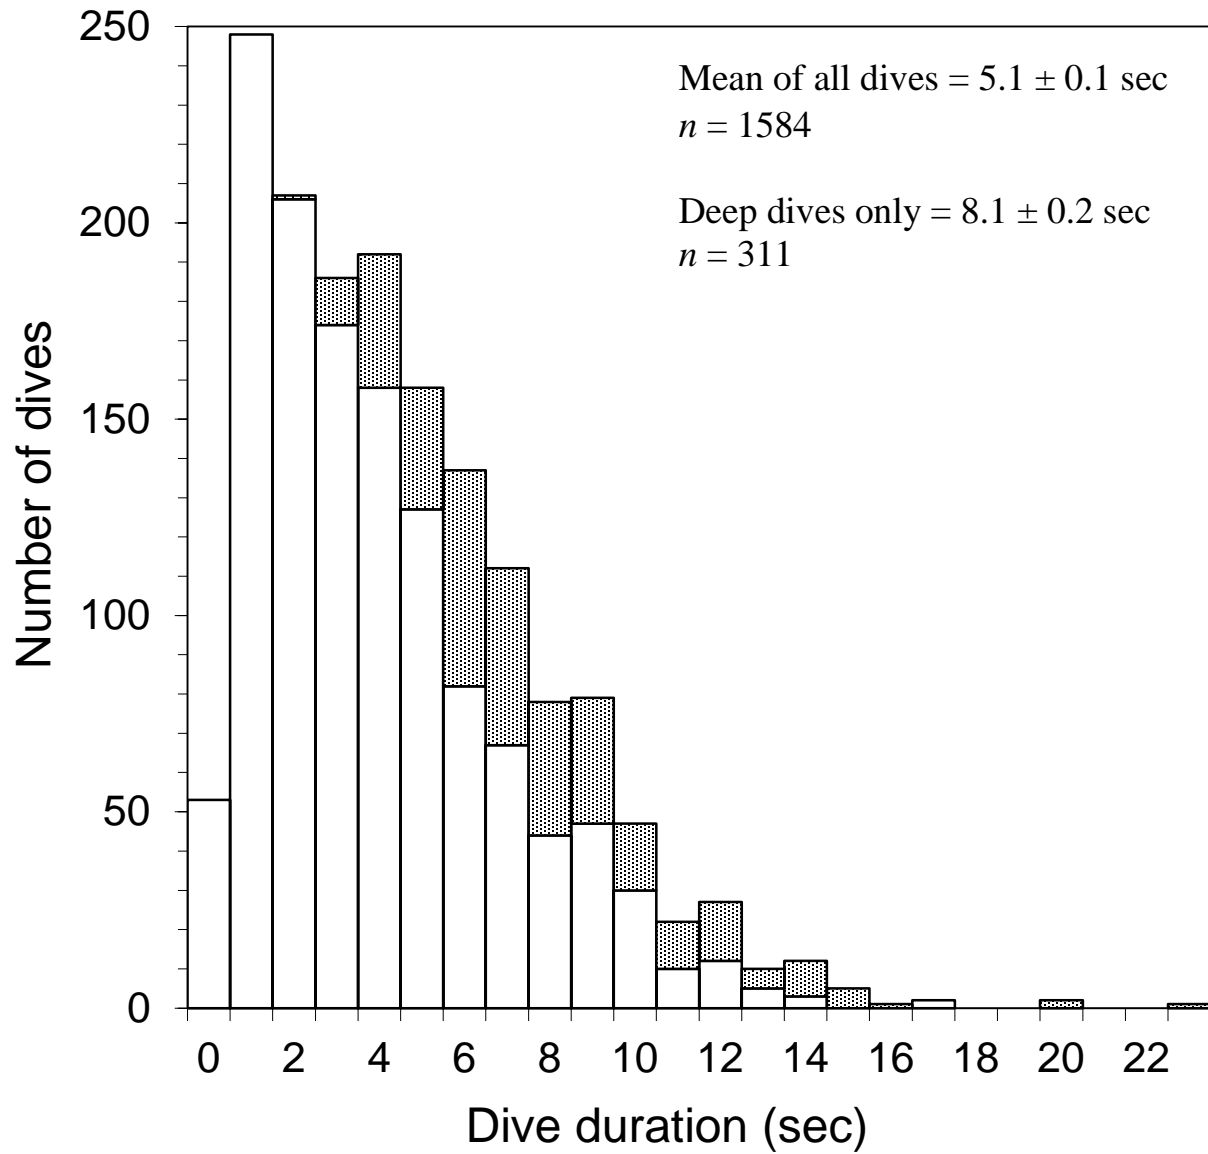

Supplemental figure 4

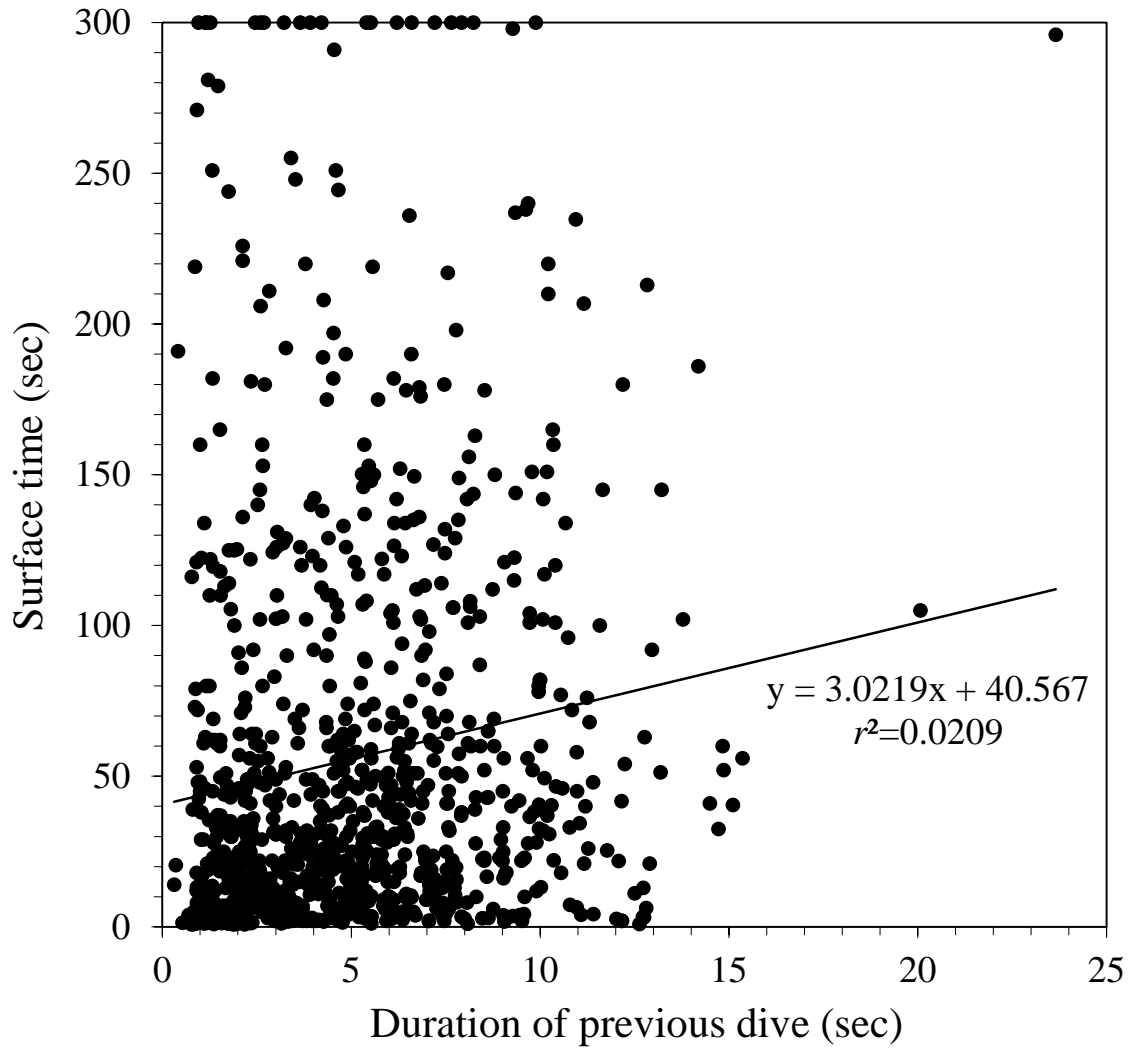

## Supplemental figure 5

Shrew #16: 28-hr trial (average mass = 16.2 g)

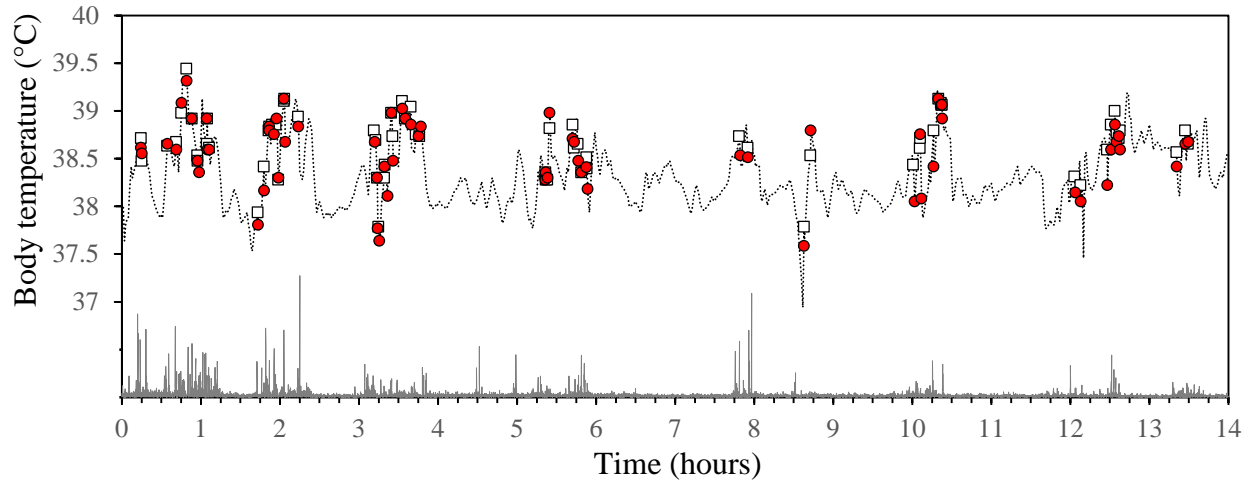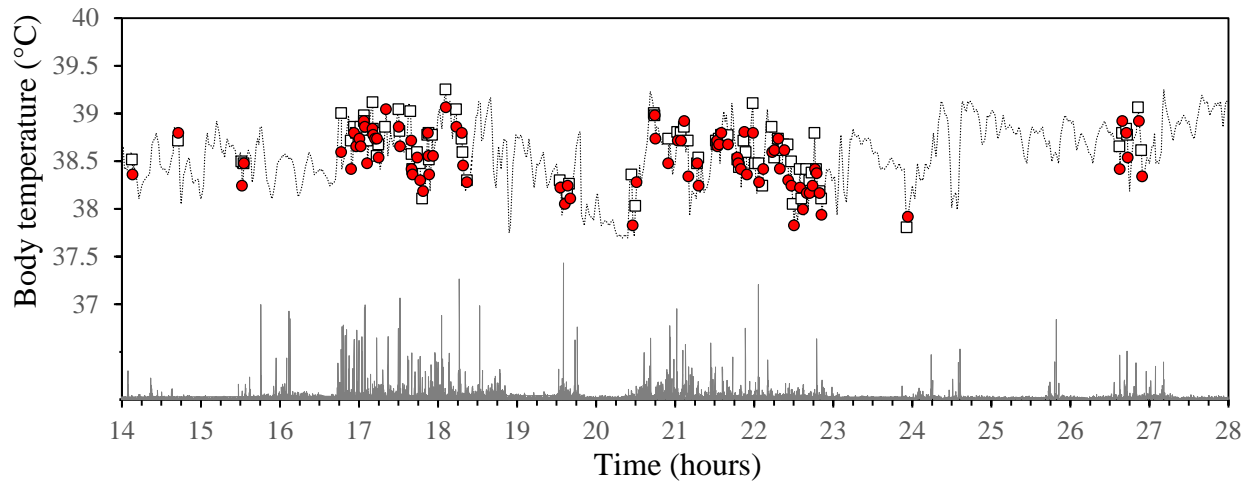

Shrew #14: 12-hr trial (average mass = 13.6 g)

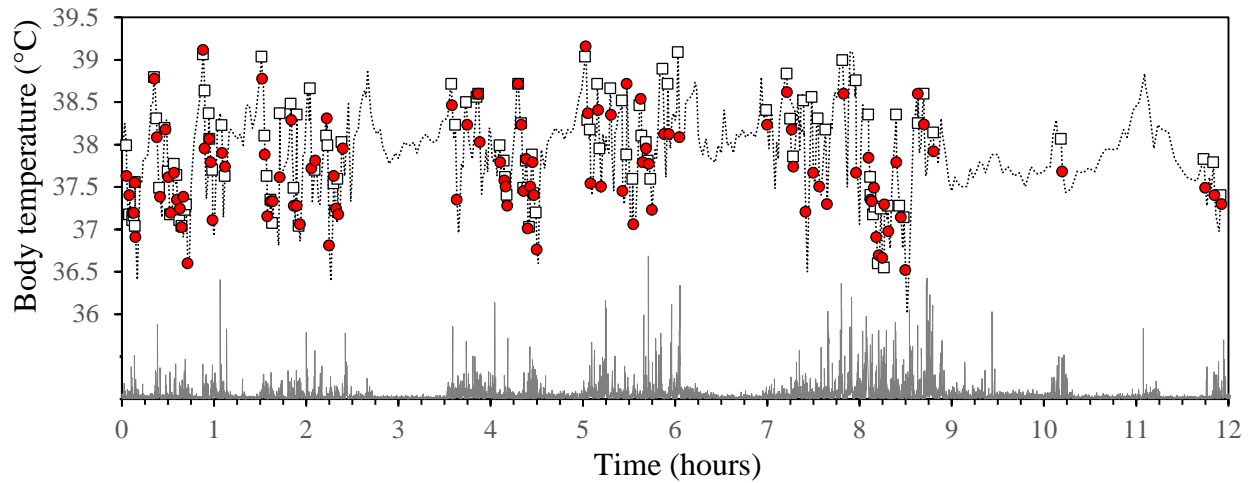



Shrew #12: 24.5-hr trial (average mass = 17.2 g)

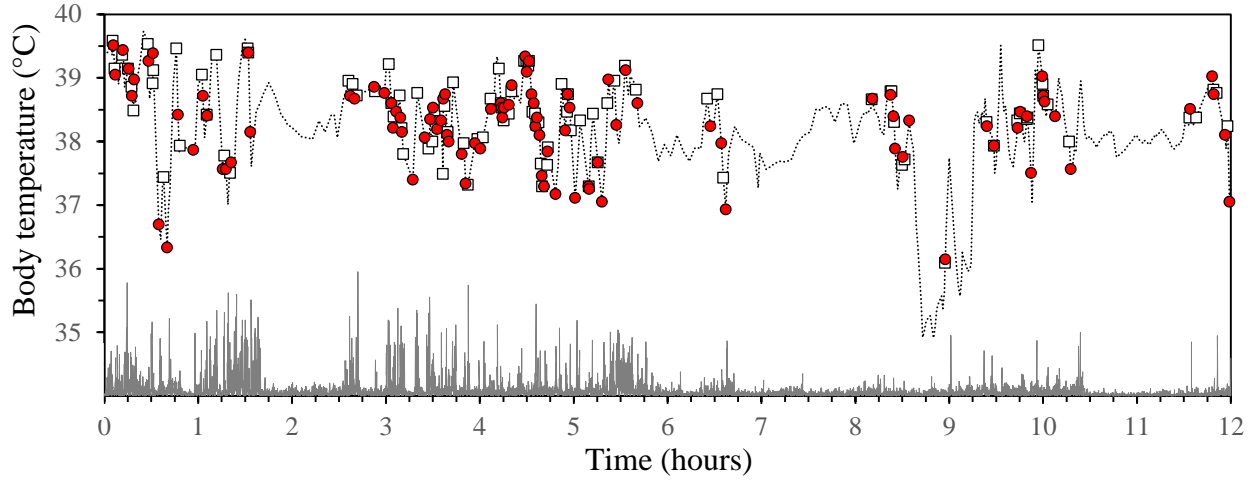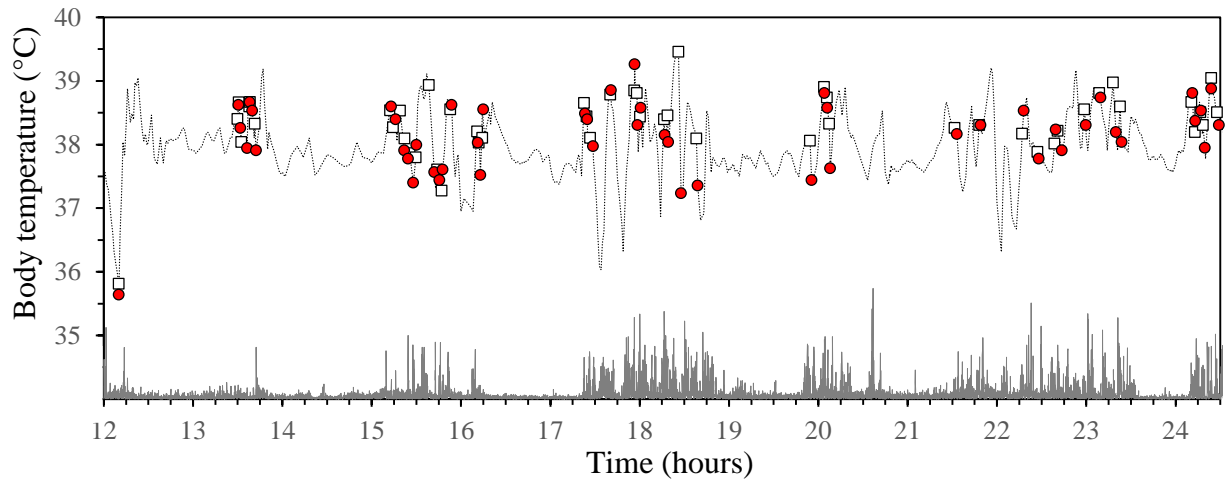

Source: https://www.biorxiv.org/content/10.1101/2021.06.02.446801v1.full.pdf
